# Supplementary material for: NMR-based plasma metabonomics in hyperlipidemia mice
Source: Royal Society of Chemistry journal article supplement (doi:10.1039/d0ay00487a), 2020-01-01
Supplement: d0ay00487a3.pdf [file d0ay00487a3.pdf]

Supplementary Figure 1 Multivariate statistical analysis by the SIMCA 14.1.

Supplementary Table 1 Signal Identification of differentially significant metabolites

Supplementary Table 2 Dynamic profiling of metabolites between HFD mice and control

Supplementary Figure 2 A correlation coefficient matrix heat map in nine points.
