# Supplementary material for: NMR-based plasma metabonomics in hyperlipidemia mice
Source: Royal Society of Chemistry journal article supplement (doi:10.1039/d0ay00487a), 2020-01-01
Supplement: d0ay00487a4.pdf [file d0ay00487a4.pdf]

Supplementary Table 1 Signal Identification of differentially significant metabolites

| Metabolites       | <sup>1</sup> H chemical shift (multiplicity)                  | structure                                                                            |
|-------------------|---------------------------------------------------------------|--------------------------------------------------------------------------------------|
| urea              | 5.77(s)                                                       | 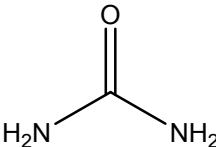   |
| glucose           | 3.44(m),3.48(m),3.76(m),3.88(dd),<br>3.69(m),5.21(d),3.71(dd) |    |
| glycylproline     | 3.91(s),3.88(s)                                               |   |
| glycerol          | 3.63(q),3.78(m),3.55(q)                                       |  |
| 3-Hydroxybutyrate | 2.38(ddq),1.20(d)                                             |  |
| glutamate         | 3.75(m),2.08(m),2.34(m)                                       |  |
| lactate           | 4.10(q),1.31(d)                                               |  |

|              |                                                      |                                                                                      |
|--------------|------------------------------------------------------|--------------------------------------------------------------------------------------|
| valine       | 3.63(d),1.02(d), 2.27(m),<br>0.99(d),1.05(d),0.97(d) | 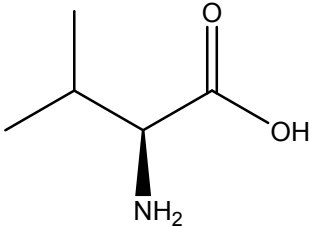   |
| glycine      | 3.573(s)                                             |    |
| alanine      | 1.48(d),3.78(q)                                      |    |
| choline      | 3.21(s),4.05(t)                                      |    |
| glutamine    | 2.44(m),2.14(m),3.77(m)                              |   |
| lysine       | 3.71(t), 1.72(m),1.92(m),<br>3.03(t),3.76(t),1.48(m) |  |
| acetone      | 2.23(s)                                              |   |
| acetate      | 1.90(s)                                              |  |
| acetoacetate | 2.27(s)                                              |  |

|                              |                                            |                                                                                      |
|------------------------------|--------------------------------------------|--------------------------------------------------------------------------------------|
| arginine                     | 1.68(m),1.92(m),3.23(t),3.78(t)            | 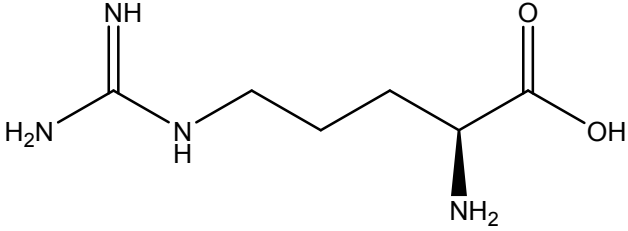   |
| aspartate                    | 2.68(dd),2.79(dd),3.89(dd)                 |    |
| butyrate                     | 0.90(t),1.55(m),2.18(t)                    |    |
| glycerophosphorylc<br>holine | 3.22(s),3.68(t),4.32(t)                    |                                                                                      |
| glycogen                     | 3.4-3.9(m),5.38-5.45(m)                    |                                                                                      |
| histidine                    | 7.07(s),7.78(s),3.25(dd),3.20(dd),4.00(dd) |   |
| myo-inositol                 | 4.06(t),3.53(dd),3.29(t)                   |  |
| scyllo-inositol              | 3.35(s)                                    |  |

|                   |                                                    |                                                                                      |
|-------------------|----------------------------------------------------|--------------------------------------------------------------------------------------|
| isoleucine        | 0.94(t),1.01(d),3.67(d),1.98(m)                    | 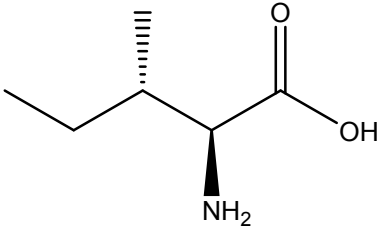   |
| leucine           | 0.95(d),0.97(d),1.72(m),3.75(t)                    |    |
| phenylalanine     | 3.98(dd),3.26(dd),3.13(dd),7.41(m),7.38(m),7.31(m) |    |
| phosphorylcholine | 3.22(s),3.61(t),4.19(t)                            |   |
| triglycerides     | 0.87(t),1.29(m)                                    |                                                                                      |
| taurine           | 3.27(t),3.43(t)                                    |  |
| tyrosine          | 6.87(d),7.17(d),3.05(dd),3.15(dd)<br>3.93(dd)      |  |
| uracil            | 5.81(d),7.54(d)                                    |  |

|                   |                                 |                                                                                      |
|-------------------|---------------------------------|--------------------------------------------------------------------------------------|
| threonine         | 1.32(d),3.58(d),4.25(m)         | 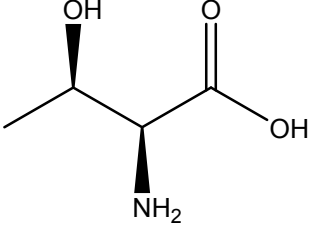   |
| pyruvate          | 2.36(s)                         |    |
| betaine           | 3.27(s),3.89(s)                 |    |
| citrate           | 2.54(d),2.56(d),2.67(d),2.69(d) |   |
| succinate         | 2.41(s)                         |  |
| dimethylglycine   | 2.93(s),3.72(s)                 |  |
| 2-hydroxyvalerate | 0.90(t),1.73(m),3.99(q)         |  |

Key: s, singlet; d, doublet; t, triplet; q, quartet; m, multiplet; dd, doublet of doublet.
