# Supplementary material for: NMR-based plasma metabonomics in hyperlipidemia mice
Source: Royal Society of Chemistry journal article supplement (doi:10.1039/d0ay00487a), 2020-01-01
Supplement: d0ay00487a5.pdf [file d0ay00487a5.pdf]

Supplementary Table 2 Dynamic profiling of metabolites between HFD mice and controls \*

| Metabolites | Day           |               |               |               |               |               |               |               |               |  |
|-------------|---------------|---------------|---------------|---------------|---------------|---------------|---------------|---------------|---------------|--|
|             | 7             | 10            | 15            | 18            | 21            | 24            | 28            | 31            | 35            |  |
| glycerol    | 0.45±0.14     | 0.49±0.02     | 0.47±0.03     | 0.87±0.10     | 0.49±0.05     | 0.49±0.03     | 0.44±0.02     | 0.55±0.10     | 0.36±0.01     |  |
|             | (0.67±0.04)   | (0.59±0.07)   | (0.57±0.07) ♦ | (1.14±0.11) ♦ | (0.66±0.15)   | (0.62±0.05)   | (0.37±0.02)   | (0.41±0.05)   | (0.38±0.01)   |  |
|             | ♦             | ♦             |               |               | ♦             | ♦             | ♦             | ♦             | ♦             |  |
| glutamate   | 0.35±0.09     | 0.53±0.02     | 1.14±0.15     | 1.23±0.11     | 1.23±0.12     | 1.22±0.07     | 1.09±0.05     | 0.61±0.04     | 1.08±0.04     |  |
|             | (0.20±0.04) ♦ | (0.42±0.06) ♦ | (0.97±0.03) ♦ | (0.88±0.04) ♦ | (0.89±0.31) ♦ | (1.00±0.09) ♦ | (0.90±0.12) ♦ | (0.53±0.05) ♦ | (0.96±0.08) ♦ |  |
| choline     | 2.45±0.15     | 2.57±0.19     | 2.50±0.27     | 3.71±0.44     | 3.05±0.28     | 2.12±0.14     | 2.55±0.20     | 2.84±0.34     | 2.34±0.20     |  |
|             | (2.19±0.25)   | (2.00±0.25) ♦ | (1.84±0.05) ♦ | (3.04±0.43) ♦ | (2.54±0.38) ♦ | (2.47±0.23) ♦ | (2.17±0.15) ♦ | (2.13±0.28) ♦ | (2.86±0.46) ♦ |  |
| leucine     | 0.90±0.05     | 1.02±0.09     | 0.73±0.06     | 0.92±0.16     | 0.90±0.07     | 0.91±0.05     | 0.99±0.13     | 0.78±0.07     | 0.82±0.03     |  |
|             | (0.82±0.05) ♦ | (0.80±0.06) ♦ | (0.66±0.03) ♦ | (1.11±0.05) ♦ | (0.73±0.10) ♦ | (0.79±0.05) ♦ | (0.74±0.06) ♦ | (0.62±0.12) ♦ | (0.75±0.02) _ |  |
| arginine    | 1.18±0.06     | 1.28±0.08     | 1.19±0.13     | 1.24±0.10     | 1.23±0.13     | 1.22±0.09     | 1.12±0.09     | 1.15±0.07     | 0.25±0.01     |  |

|           |              |              |              |              |              |              |              |              |              |
|-----------|--------------|--------------|--------------|--------------|--------------|--------------|--------------|--------------|--------------|
|           | (1.01±0.09)◆ | (0.93±0.09)◆ | (0.78±0.05)  | (0.82±0.11)◆ | (0.81±0.20)  | (0.93±0.07)◆ | (0.83±0.12)◆ | (0.88±0.12)◆ | (0.23±0.01)◆ |
| glucose   | 1.04±0.08    | 3.96±0.42    | 1.35±0.14    | 1.92±0.32    | 1.25±0.09    | 1.46±0.10    | 0.96±0.07    | 1.15±0.09    | 1.13±0.02    |
|           | (1.21±0.14)◆ | (2.87±0.52)◆ | (1.15±0.10)◆ | (1.53±0.14)◆ | (0.92±0.29)◆ | (1.19±0.16)◆ | (0.85±0.08)◆ | (0.90±0.15)◆ | (1.01±0.03)◆ |
| glutamine | 0.54±0.07    | 0.57±0.05    | 0.62±0.07    | 0.63±0.07    | 0.69±0.05    | 0.61±0.02    | 0.36±0.05    | 0.39±0.08    | 0.53±0.03    |
|           | (0.50±0.11)  | (0.45±0.06)◆ | (0.53±0.02)◆ | (0.52±0.07)◆ | (0.50±0.12)◆ | (0.52±0.05)◆ | (0.47±0.04)◆ | (0.53±0.02)◆ | (0.47±0.03)◆ |
| betaine   | 0.36±0.03    | 1.13±0.08    | 2.89±0.23    | 2.28±0.26    | 1.24±0.11    | 2.06±0.20    | 1.33±0.06    | 1.25±0.09    | 0.25±0.01    |
|           | (0.29±0.05)◆ | (0.93±0.05)◆ | (2.53±0.20)◆ | (1.49±0.09)◆ | (1.07±0.10)◆ | (1.59±0.22)◆ | (1.11±0.10)◆ | (1.09±0.11)◆ | (0.22±0.02)◆ |
| valine    | 0.71±0.12    | 0.39±0.07    | 0.86±0.06    | 0.47±0.09    | 0.35±0.03    | 0.09±0.01    | 0.49±0.07    | 0.33±0.05    | 0.20±0.01    |
|           | (0.77±0.15)  | (0.26±0.07)  | (0.76±0.07)◆ | (0.60±0.03)◆ | (0.31±0.02)  | (0.10±0.01)  | (0.32±0.03)◆ | (0.23±0.01)◆ | (0.22±0.01)◆ |
|           |              | ◆            |              |              | ◆            | ◆            |              |              |              |
| alanine   | 0.44±0.05    | 0.39±0.03    | 0.39±0.03    | 0.47±0.09    | 0.46±0.06    | 0.44±0.06    | 0.44±0.07    | 0.39±0.07    | 0.36±0.04    |
|           | (0.40±0.08)  | (0.37±0.05)  | (0.30±0.02)◆ | (0.36±0.05)◆ | (0.34±0.07)◆ | (0.29±0.02)◆ | (0.61±0.05)◆ | (0.61±0.12)◆ | (0.29±0.02)◆ |

|        |             |              |              |              |              |              |              |              |              |
|--------|-------------|--------------|--------------|--------------|--------------|--------------|--------------|--------------|--------------|
| lysine | 1.90±0.37   | 2.52±0.45    | 1.73±0.14    | 2.26±0.39    | 1.25±0.09    | 2.10±0.20    | 0.32±0.06    | 1.27±0.15    | 2.21±0.19    |
|        | (1.60±0.37) | (1.66±0.34)◆ | (1.41±0.15)◆ | (1.05±0.11)◆ | (0.92±0.29)◆ | (1.51±0.28)◆ | (0.22±0.01)◆ | (0.89±0.25)◆ | (1.94±0.16)◆ |

\* : HL(control): n=5(n=5). ◆P<0.05; Student's t test.
