# Supplementary figures and images for: NMR-based plasma metabonomics in hyperlipidemia mice
Source: Royal Society of Chemistry journal article supplement (doi:10.1039/d0ay00487a), 2020-01-01

Day 7

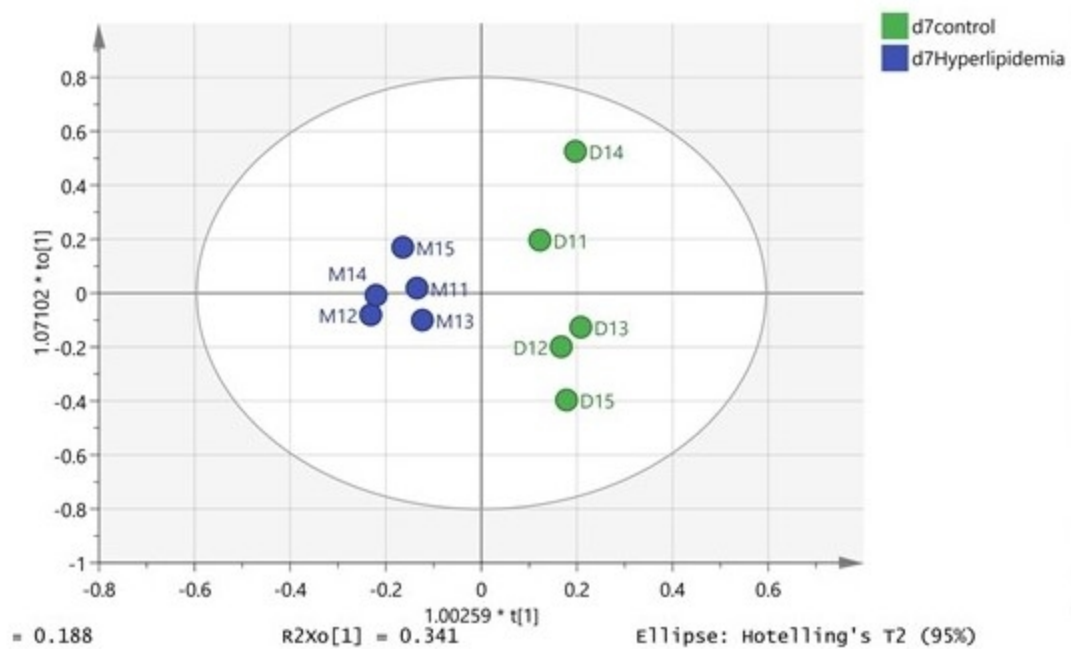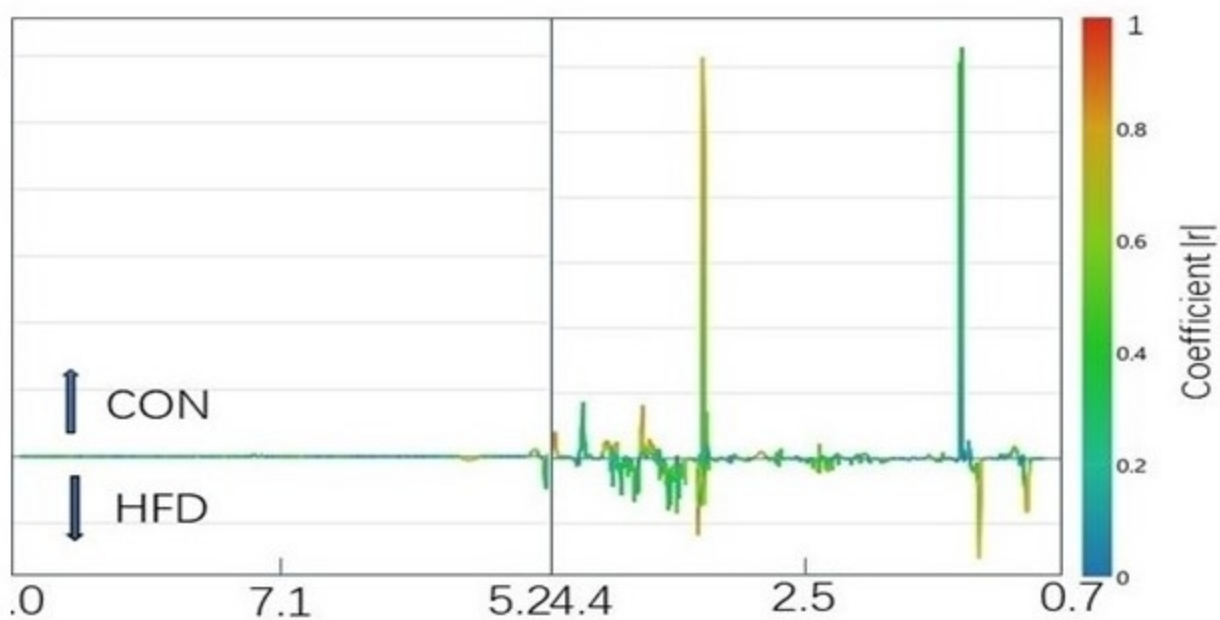

Day 10

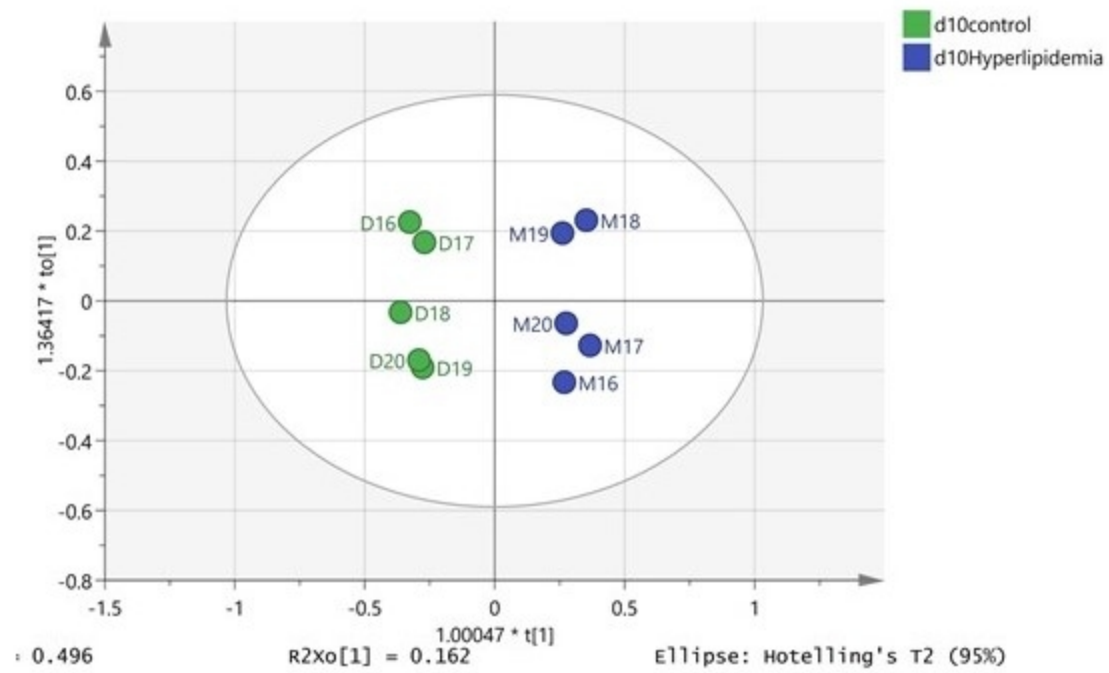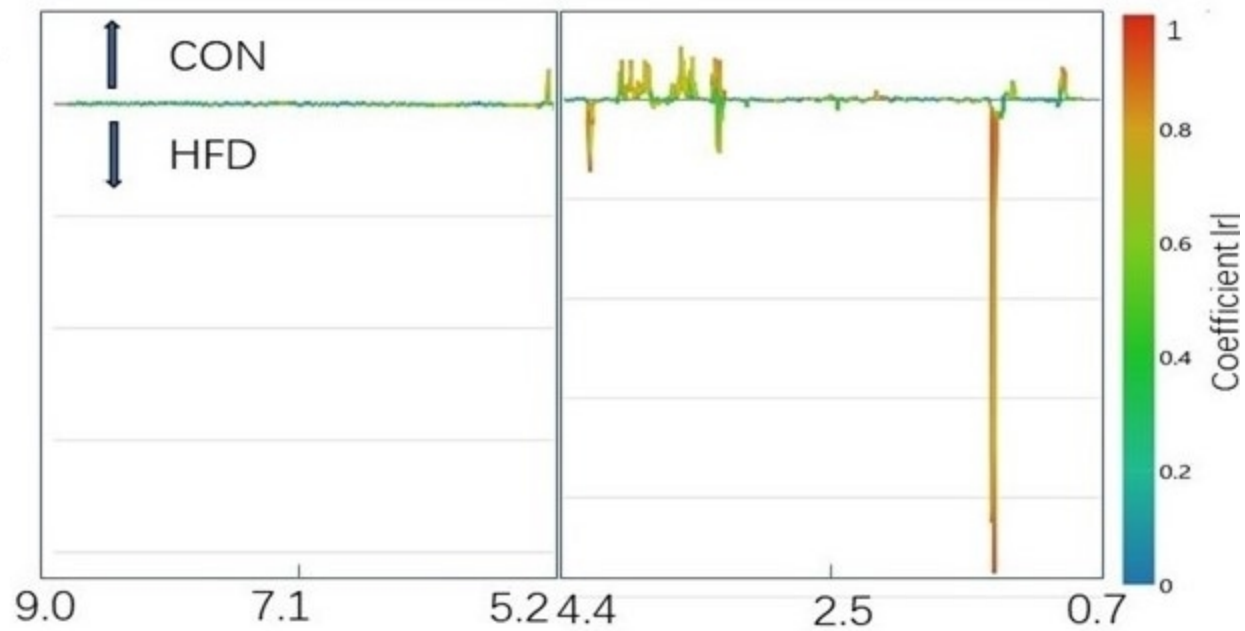

# Day 15

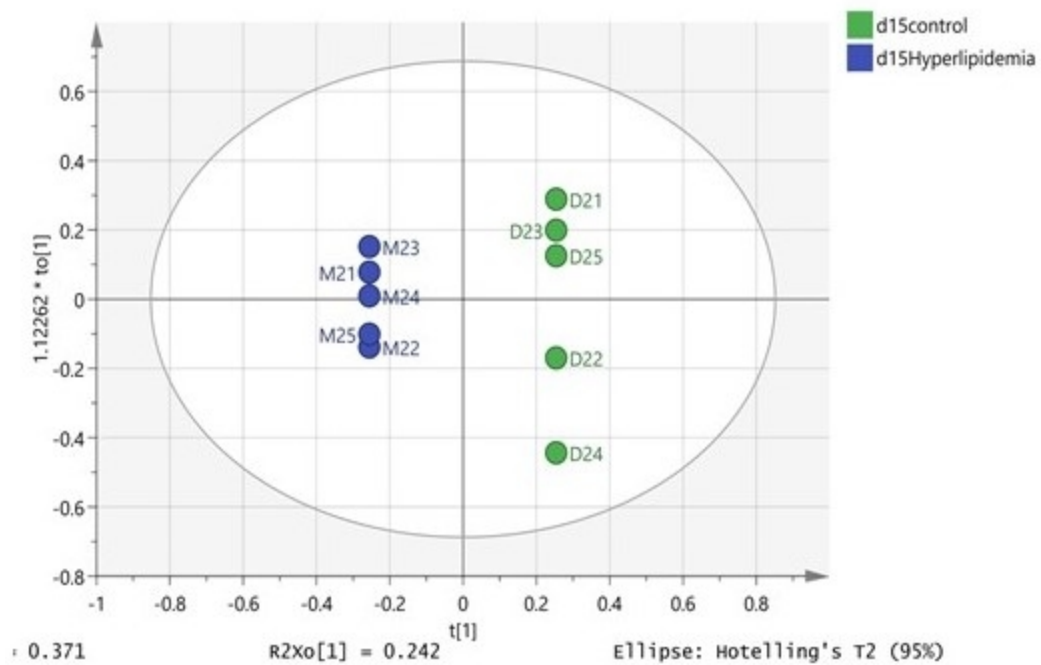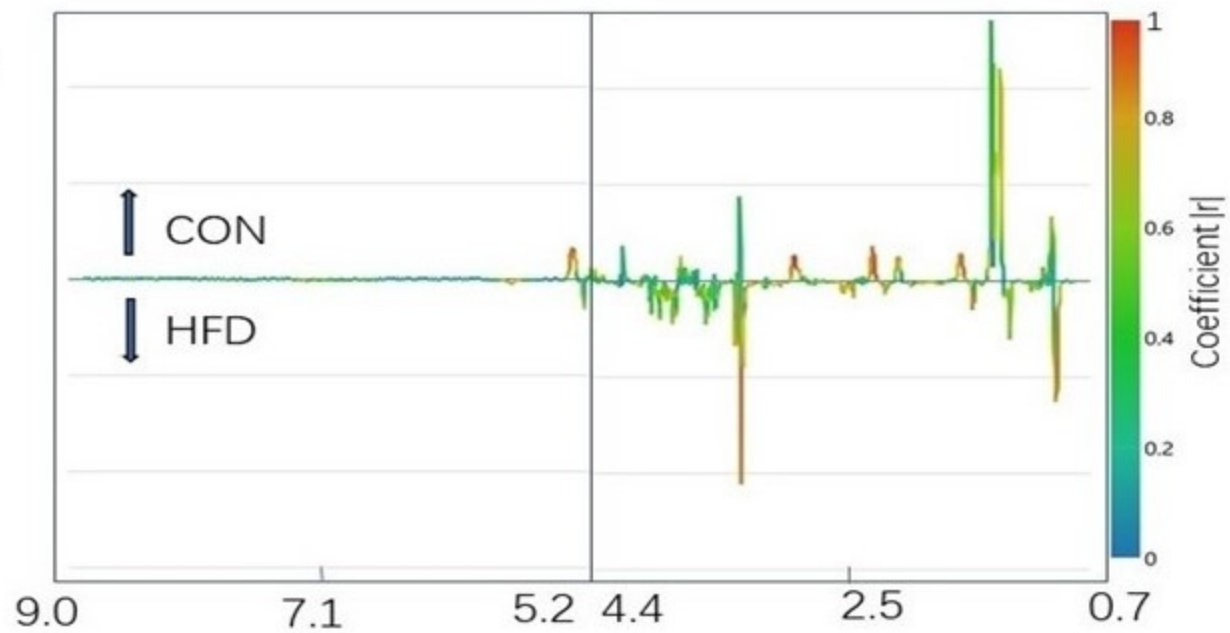

# Day 18

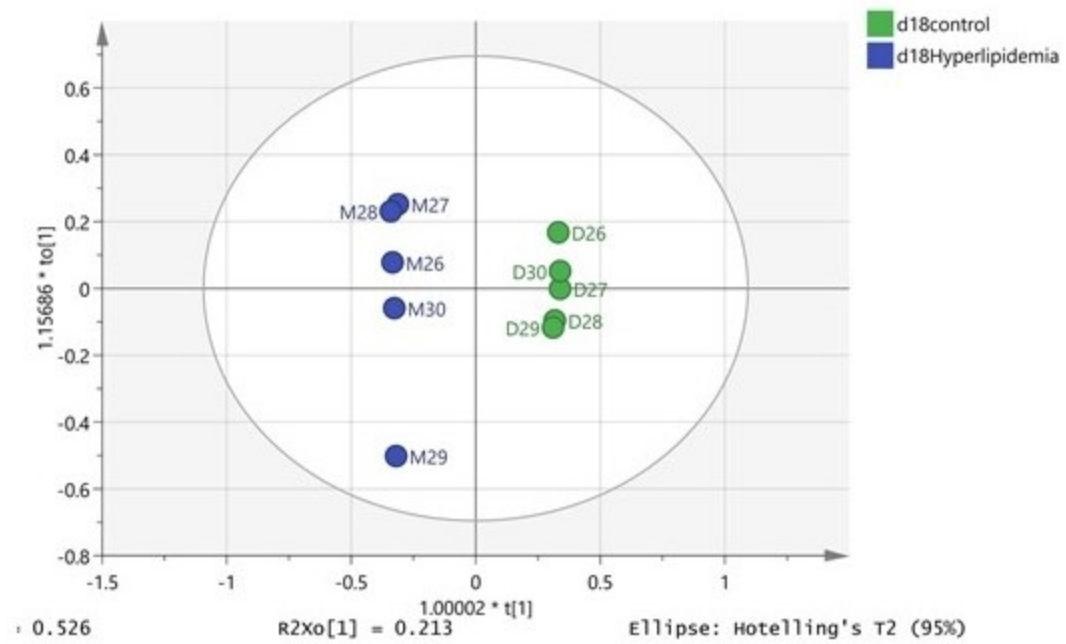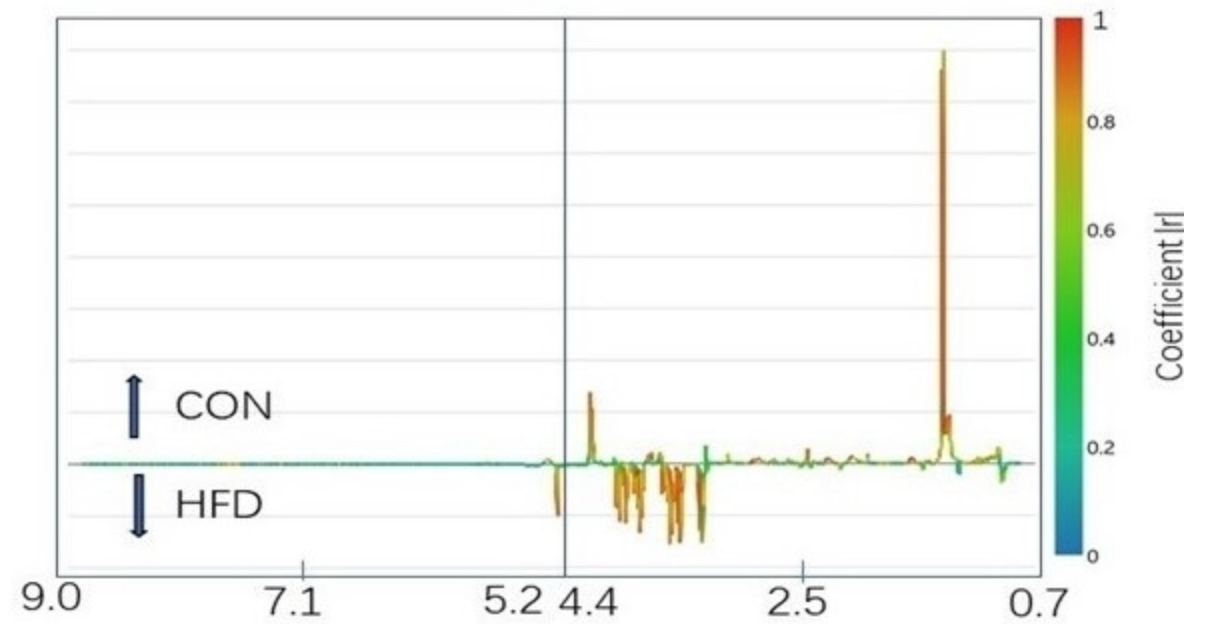

Day 21

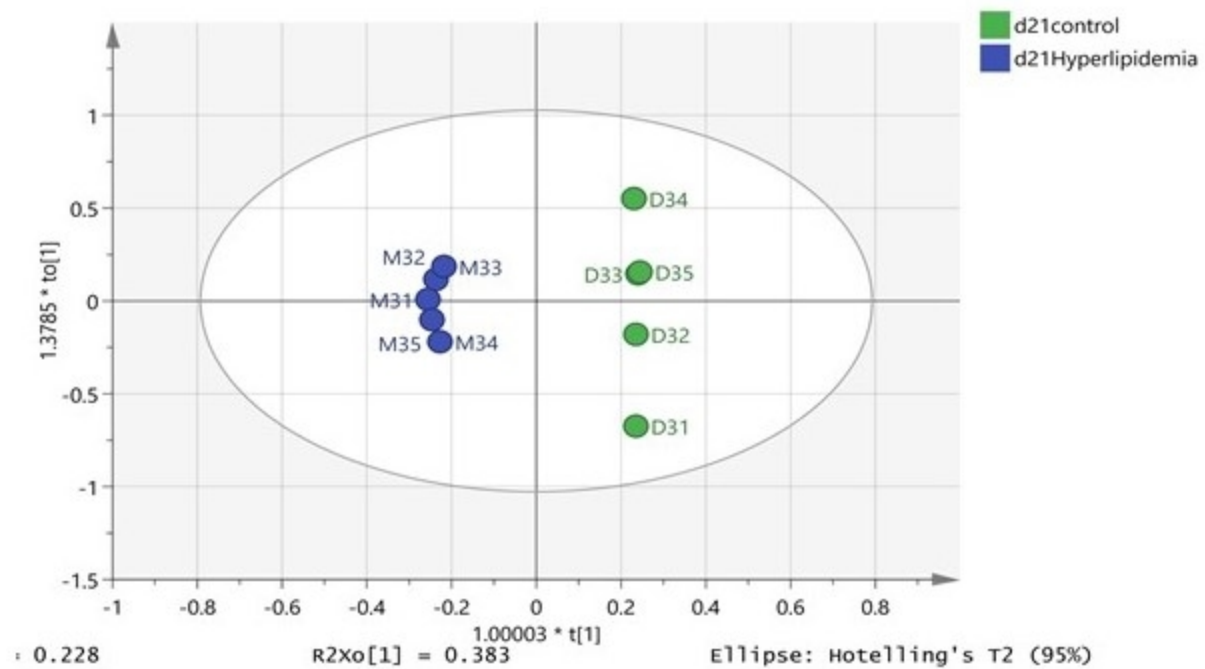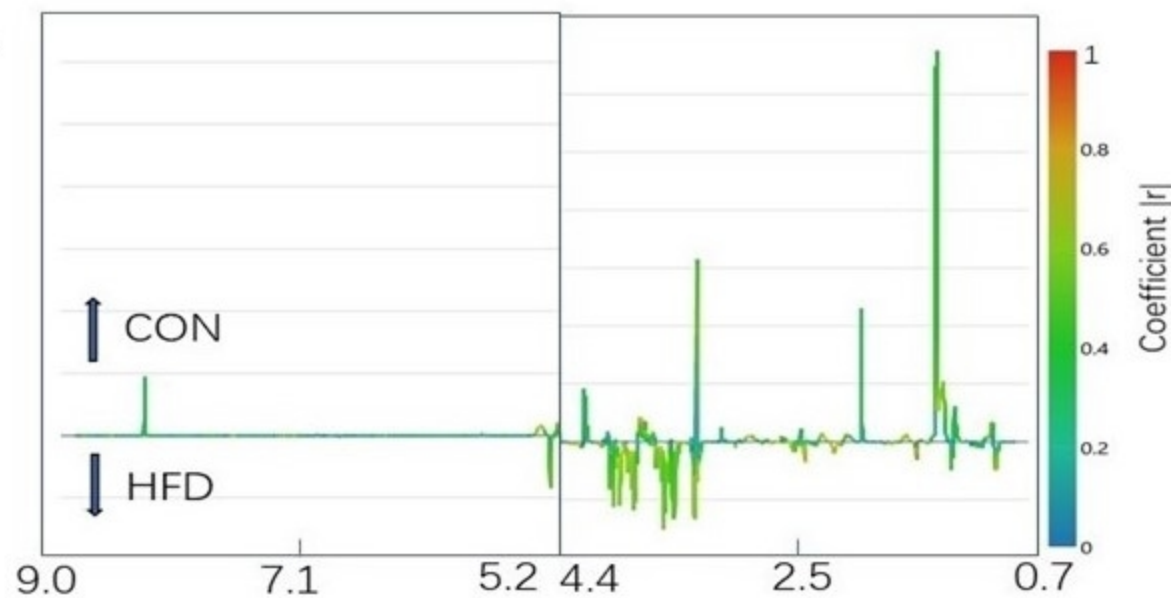

# Day 24

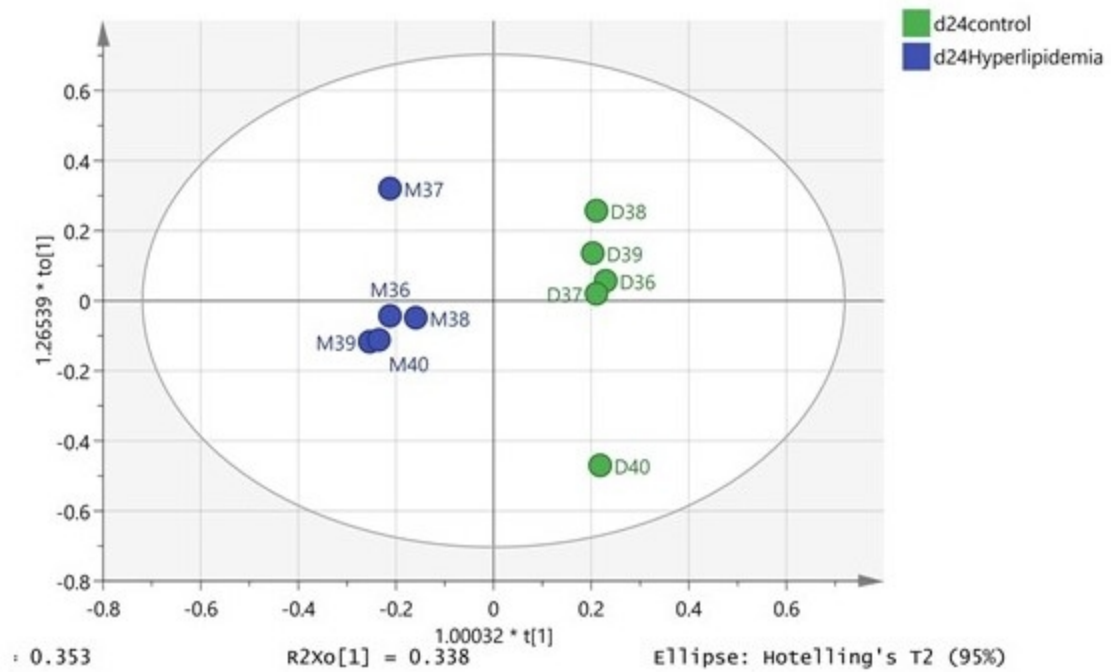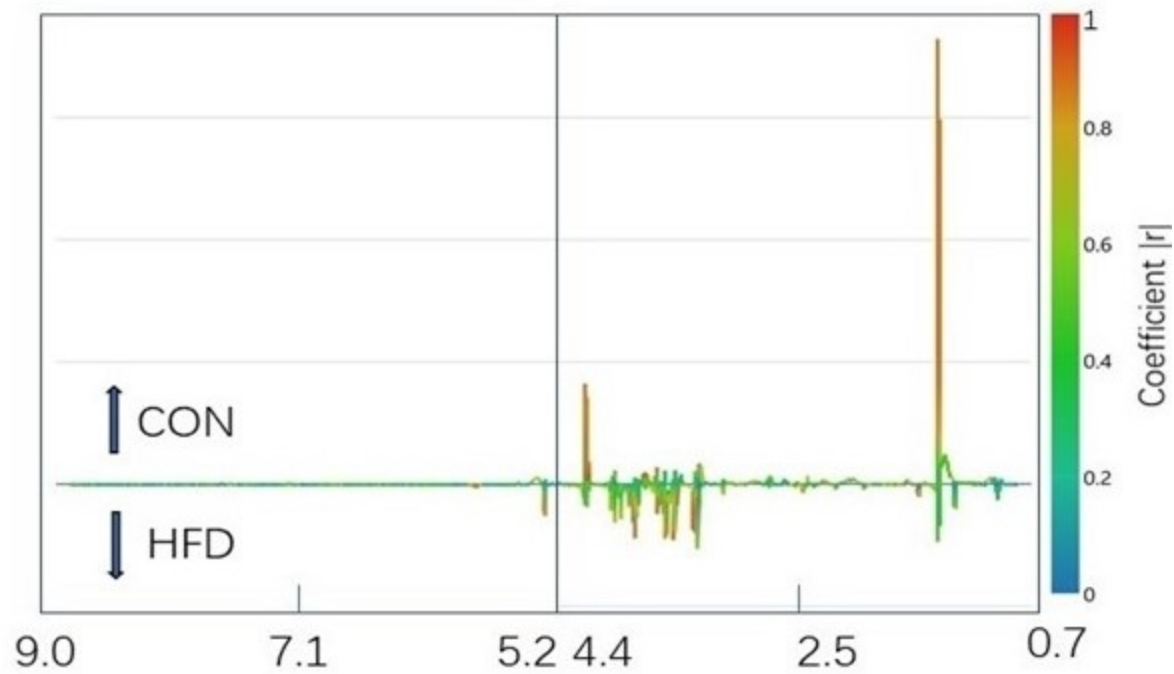

# Day 28

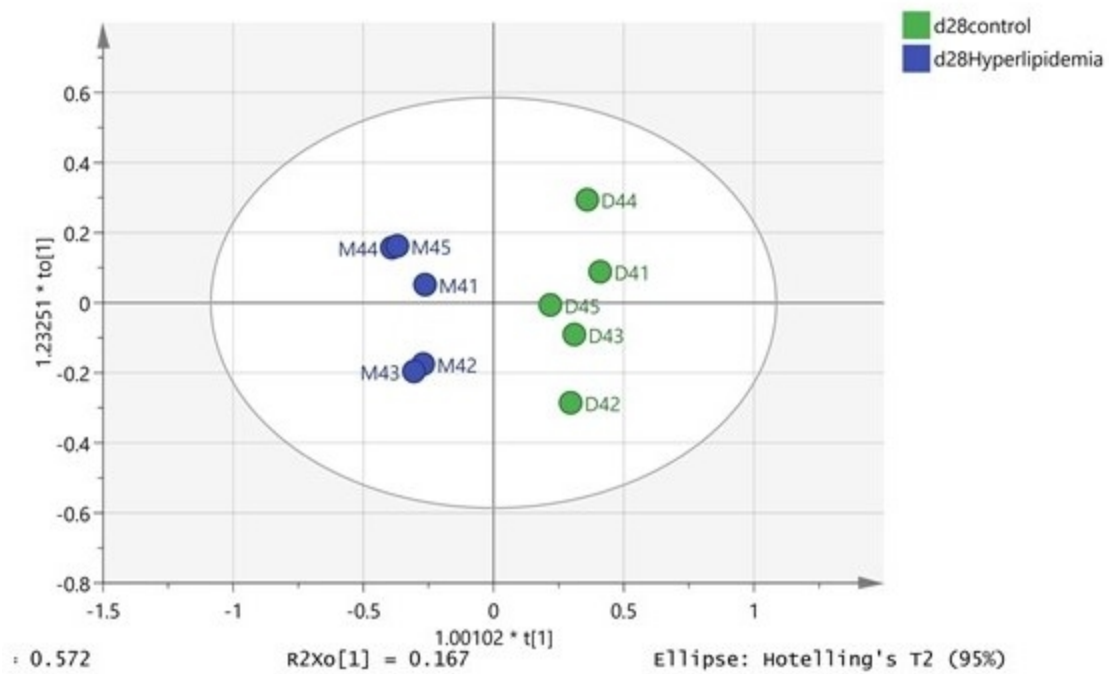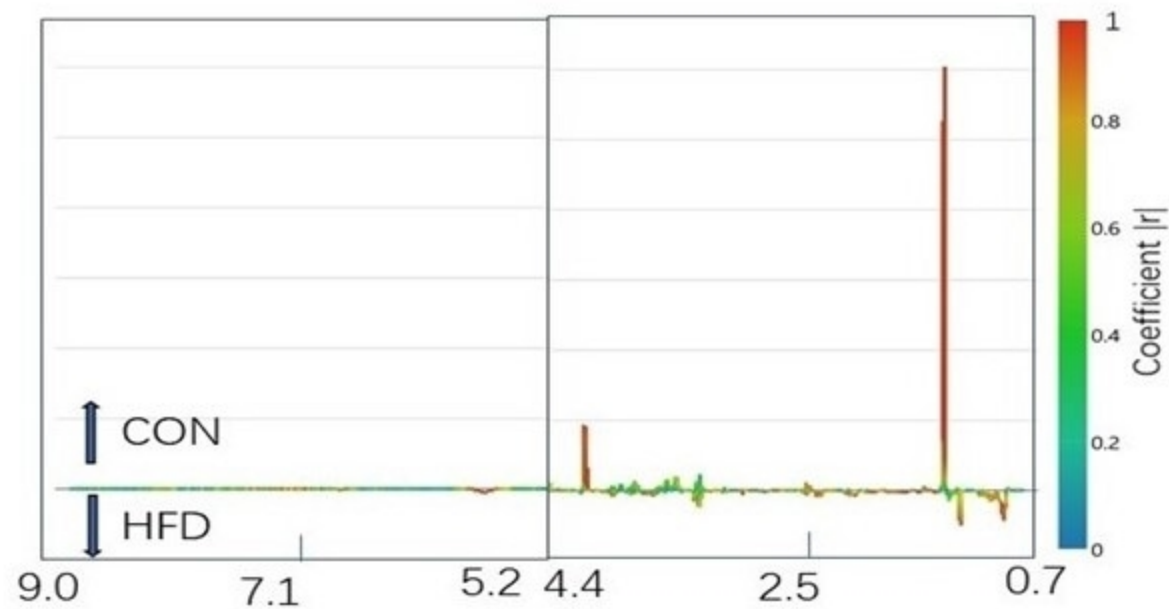

Day 31

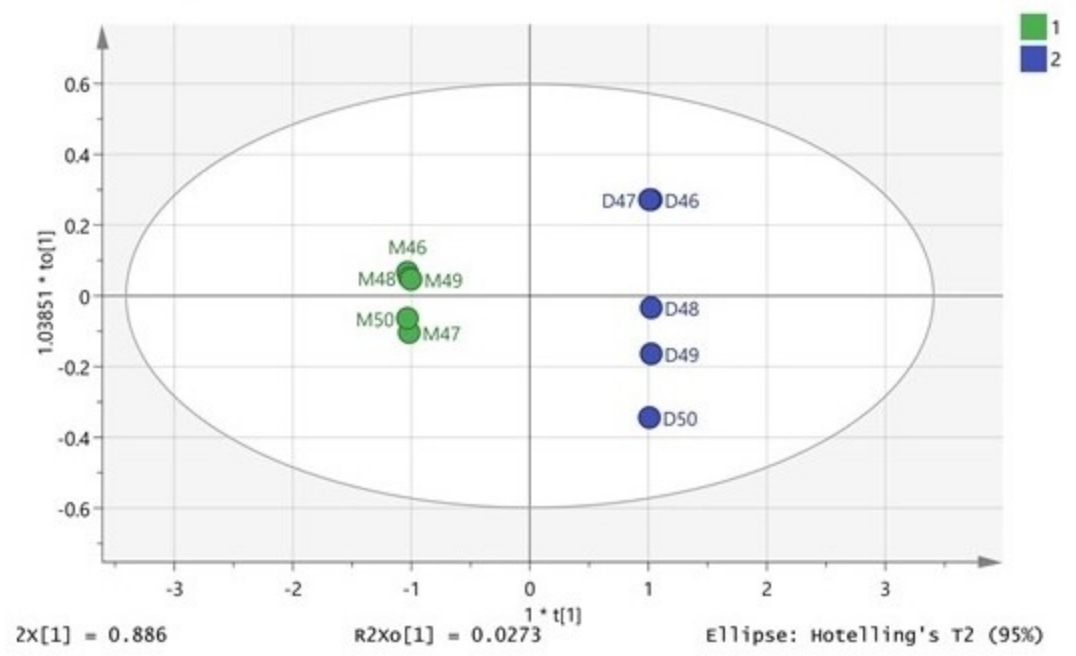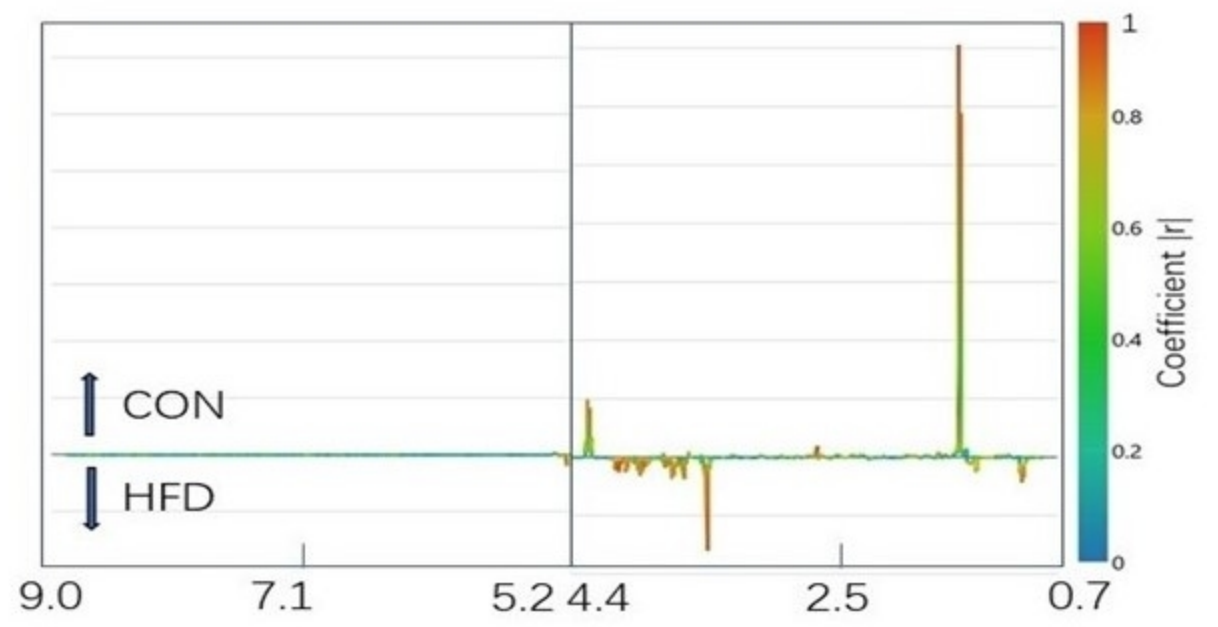



# Day 35

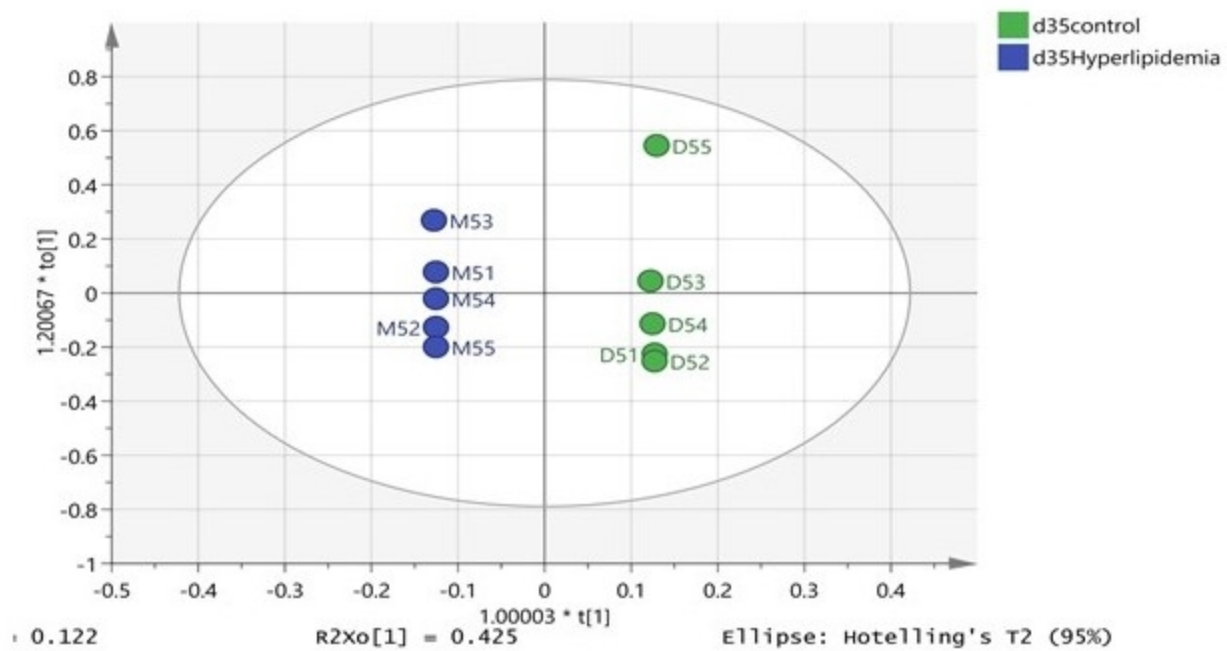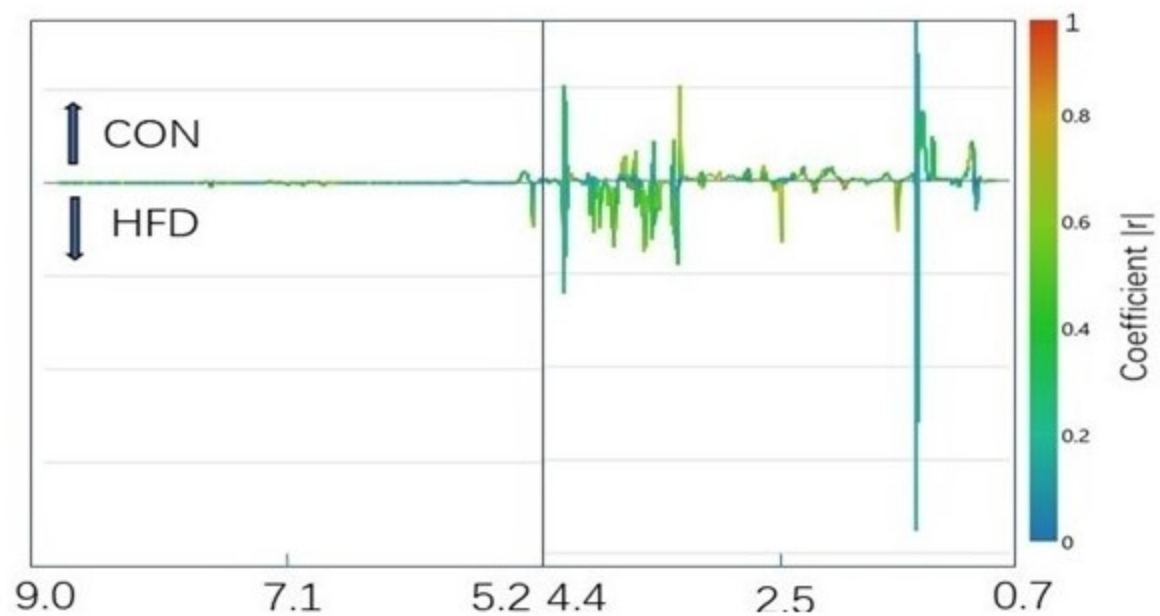

Supplement: d0ay00487a1.pdf [file d0ay00487a1.pdf]

Day 1

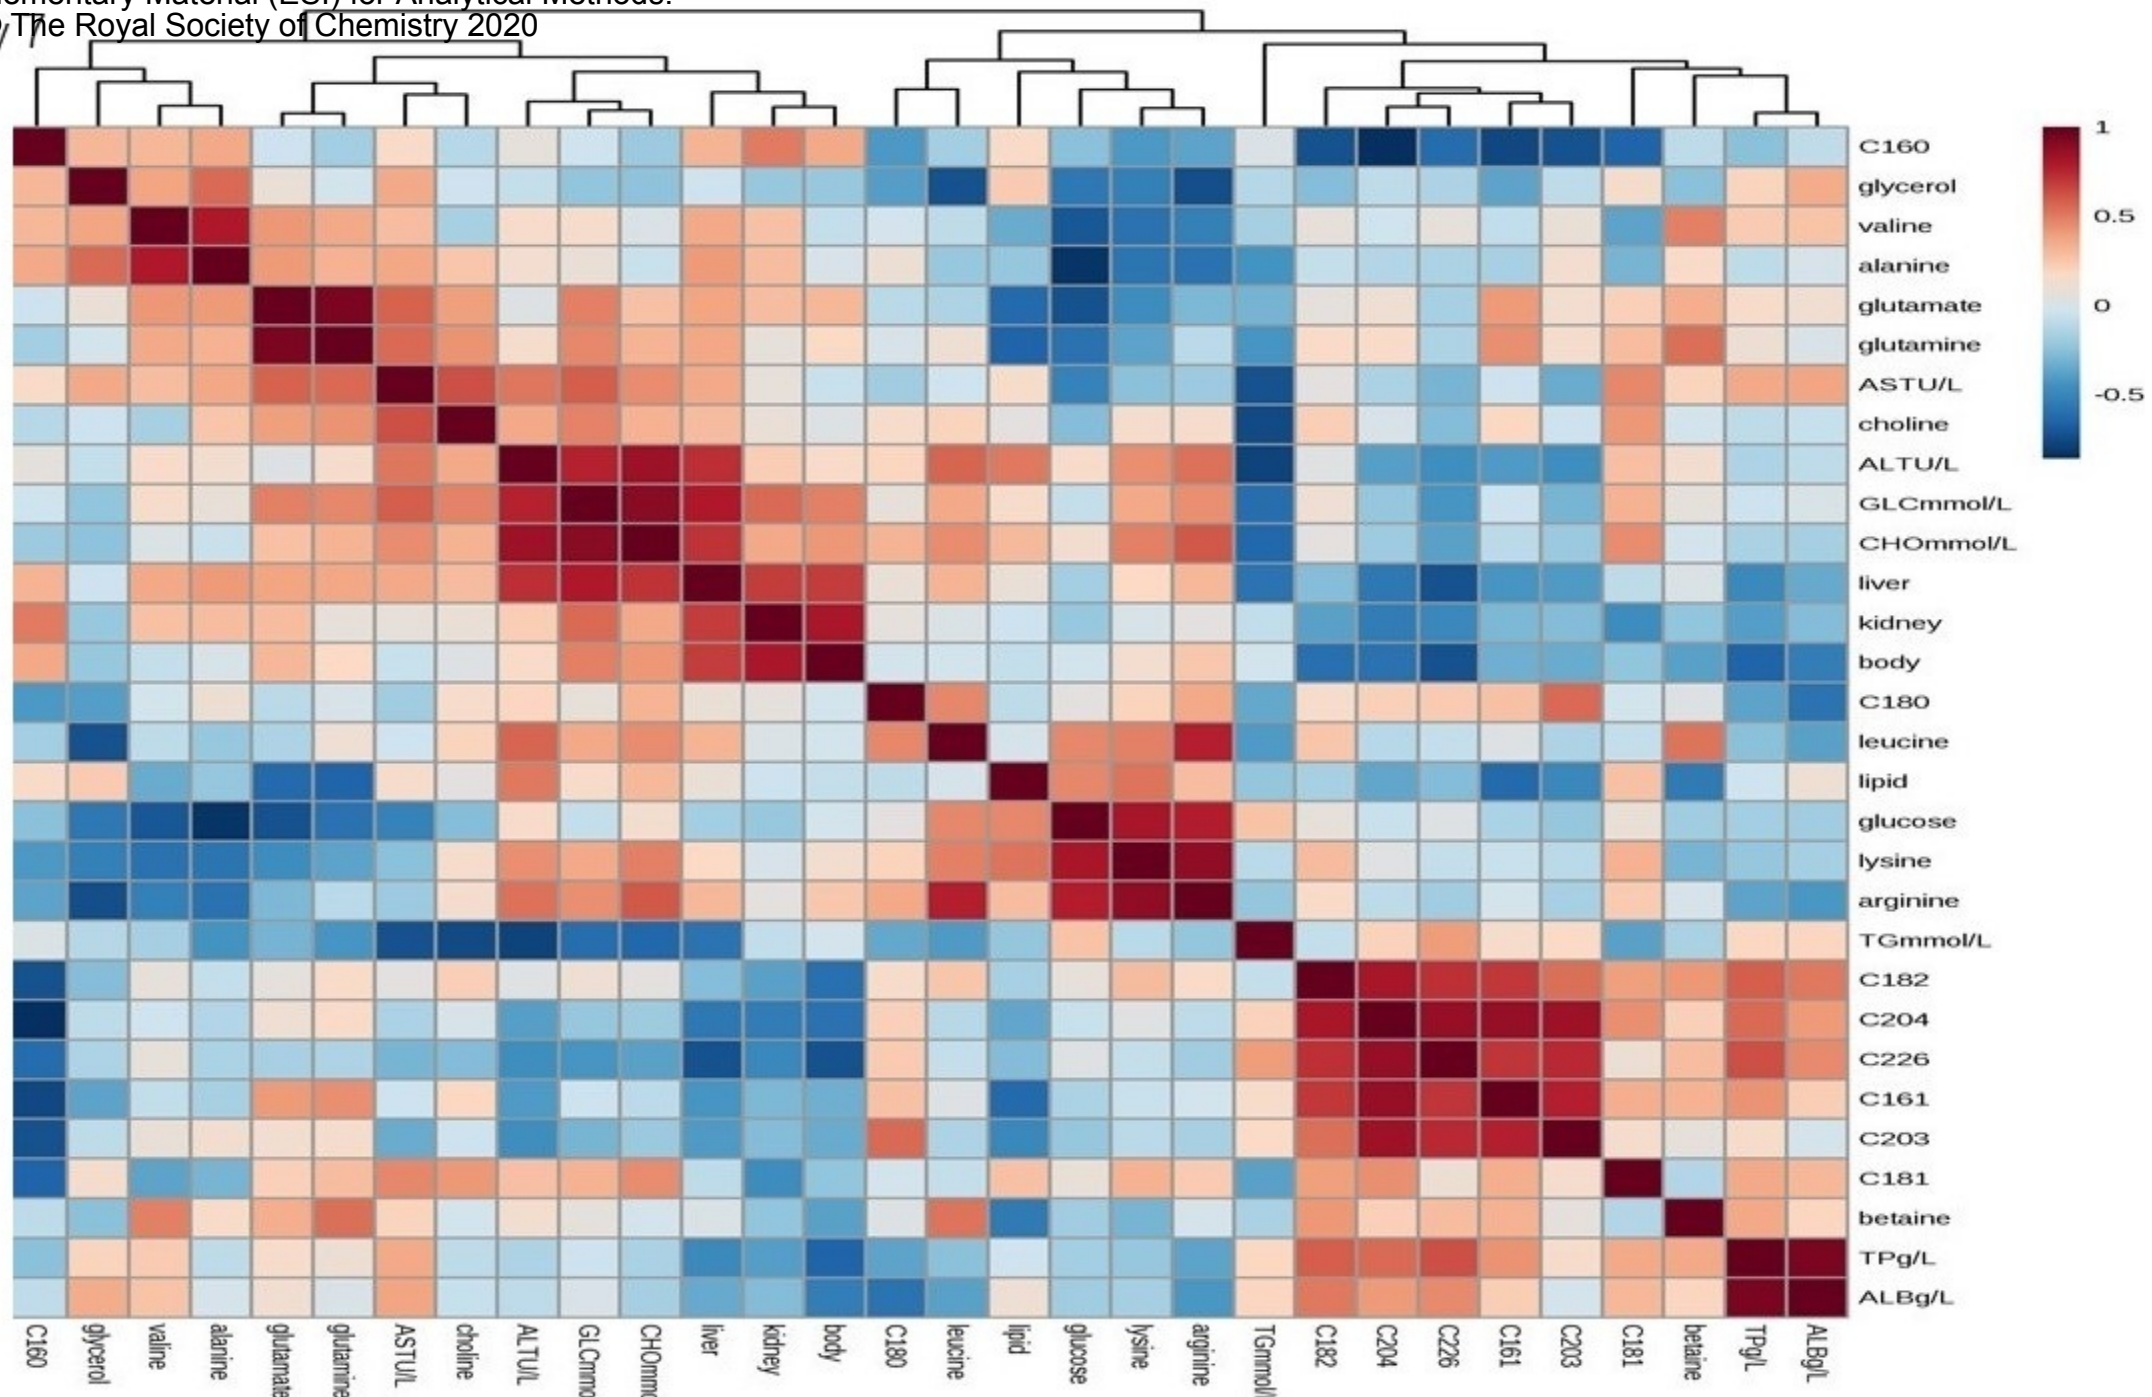

Day 10

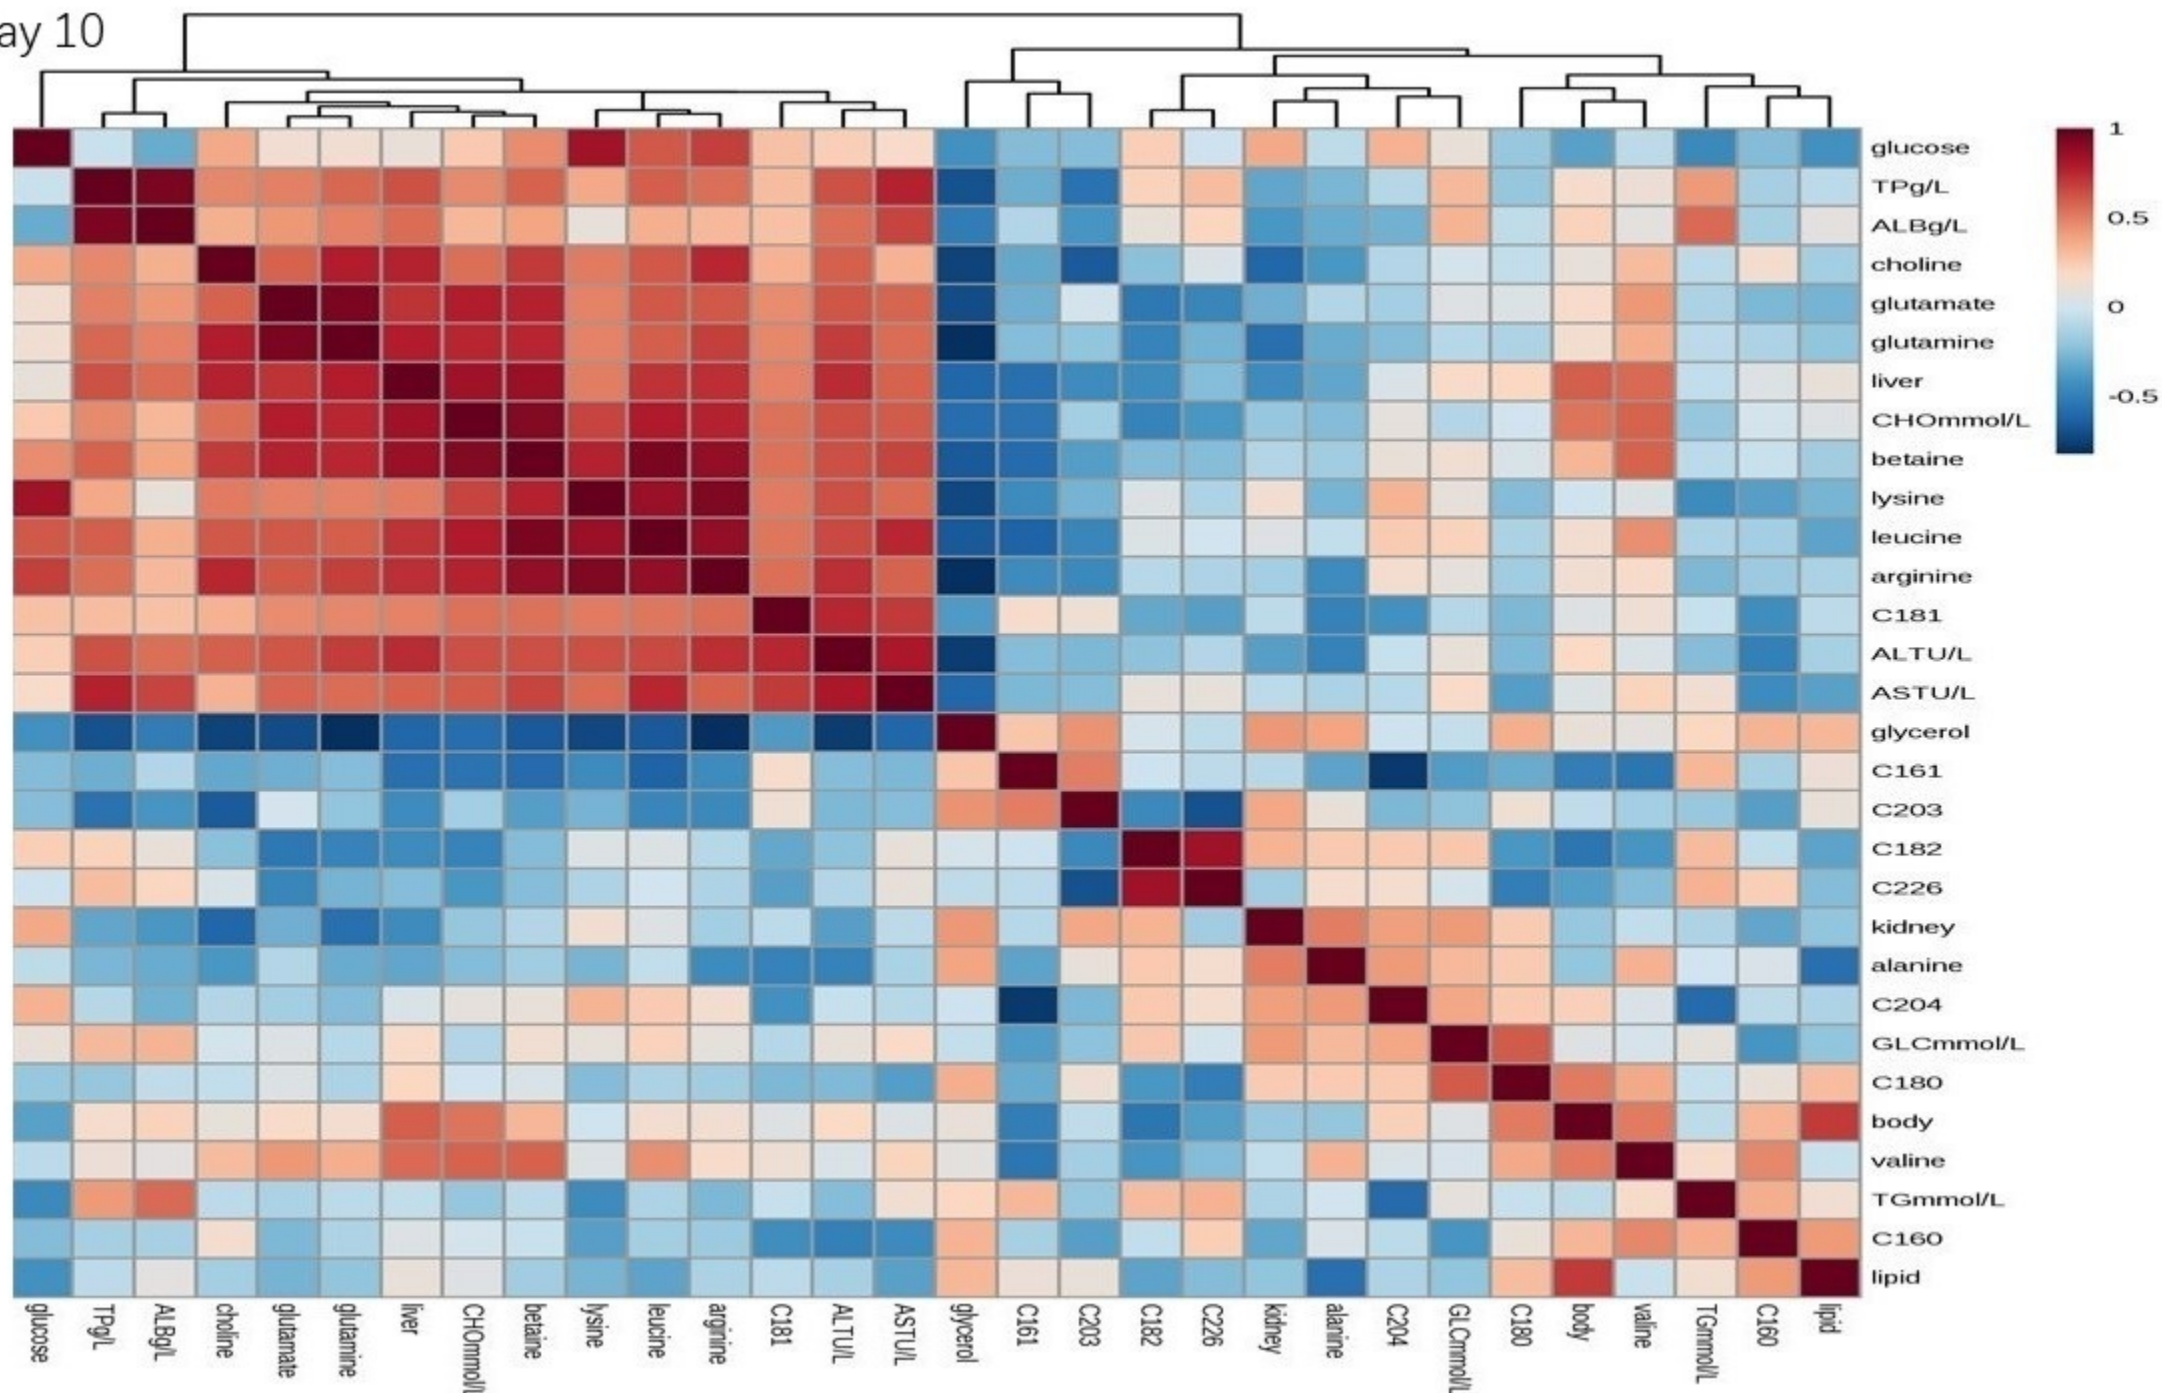

Day 15

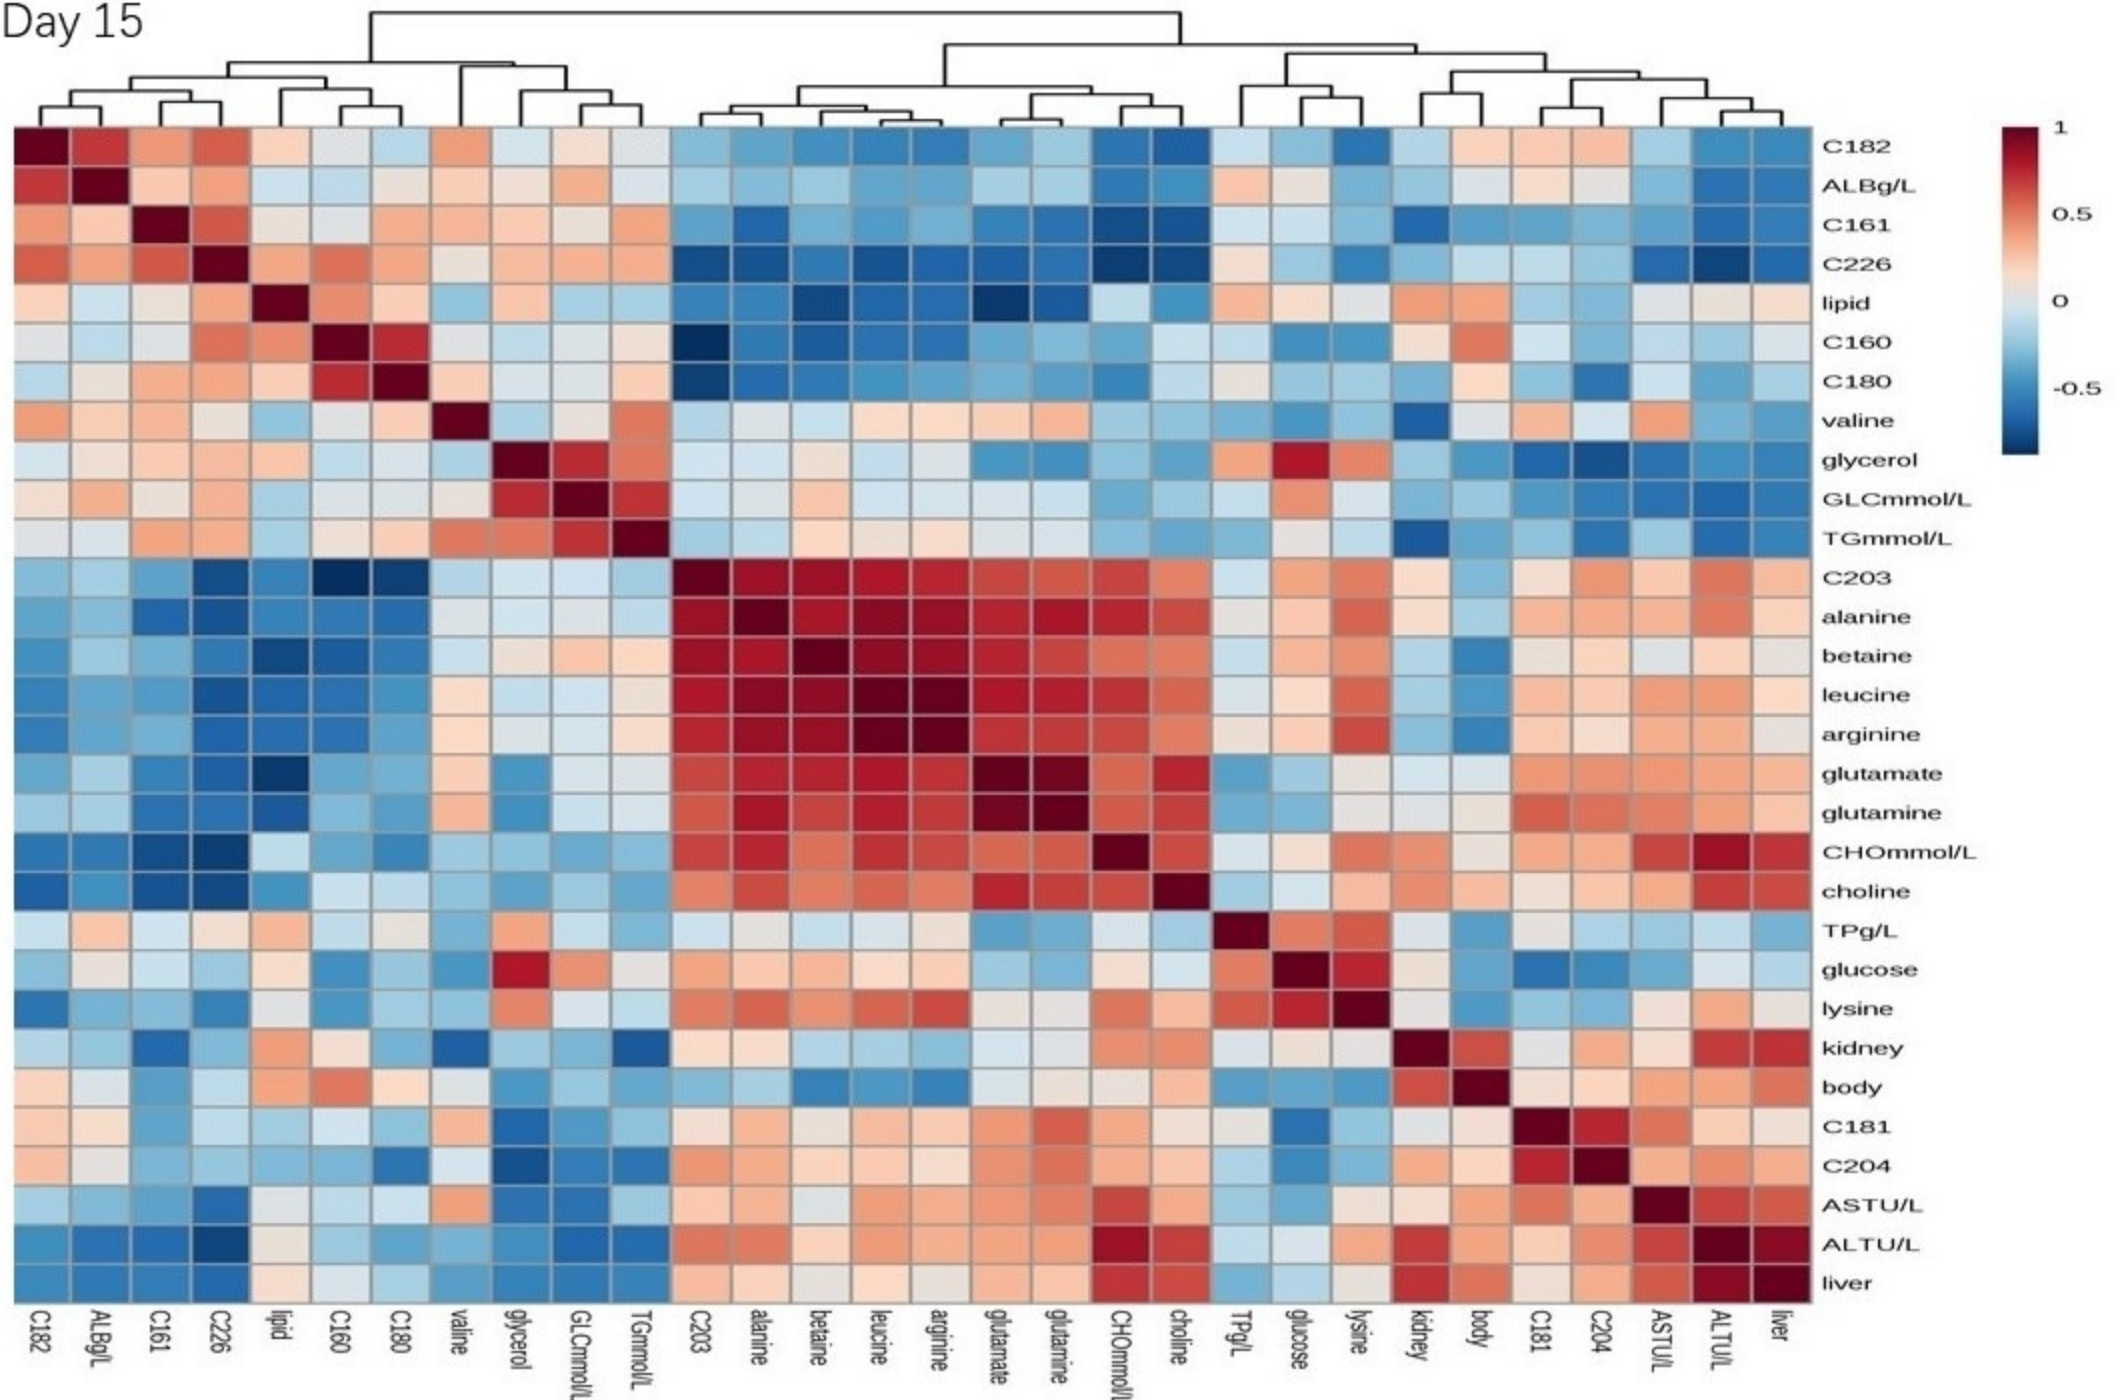





Day 24

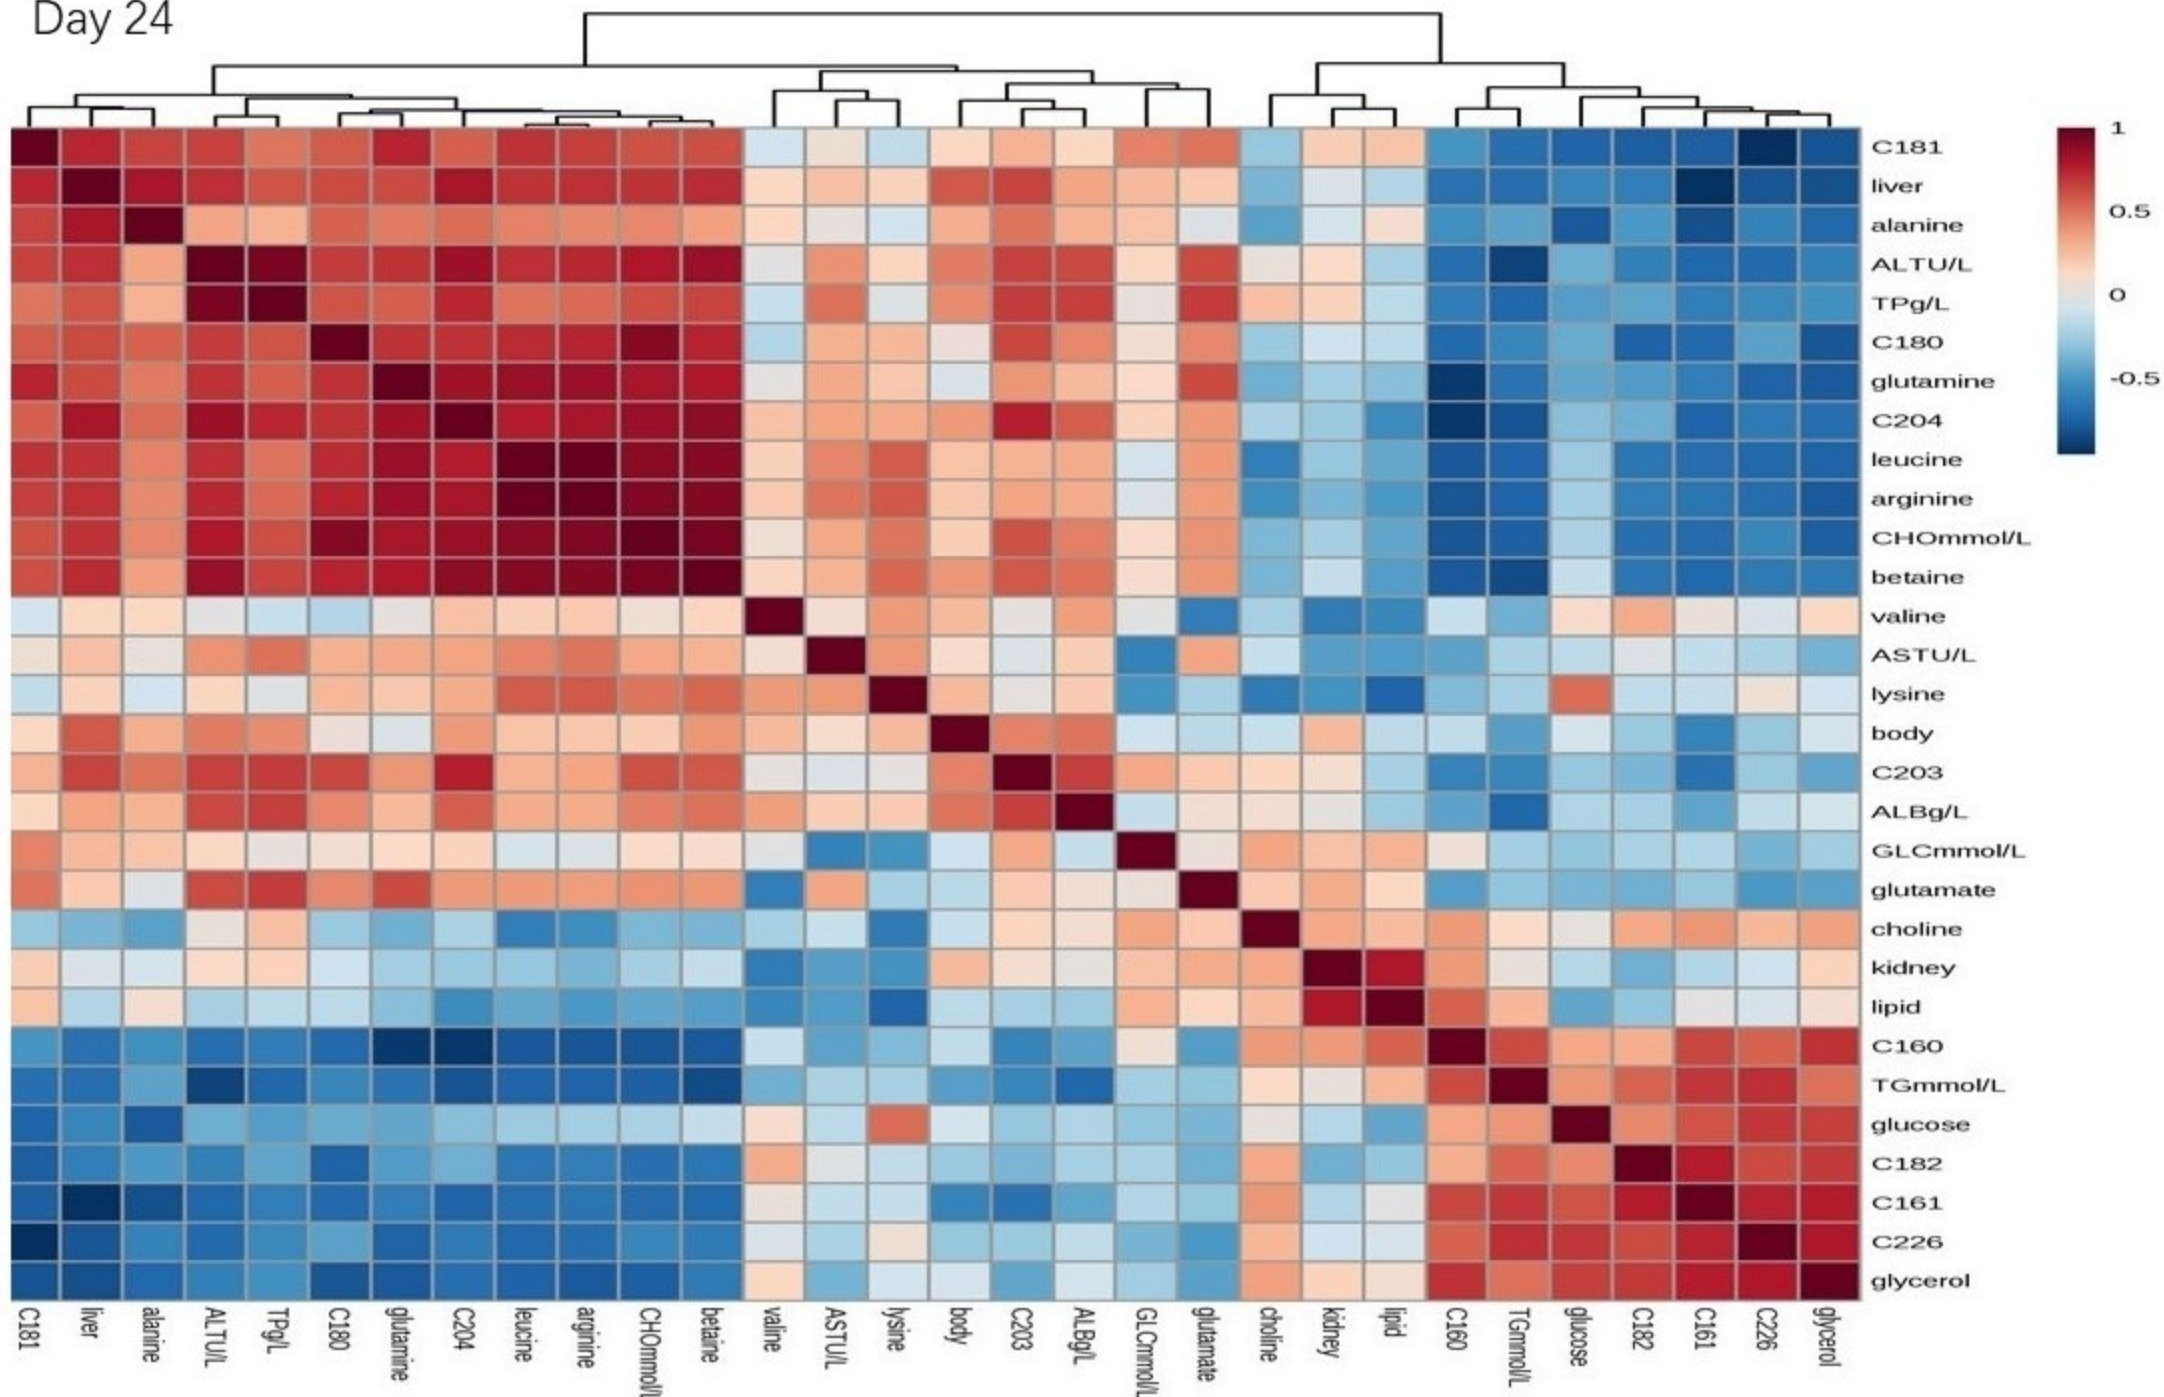

Day 28

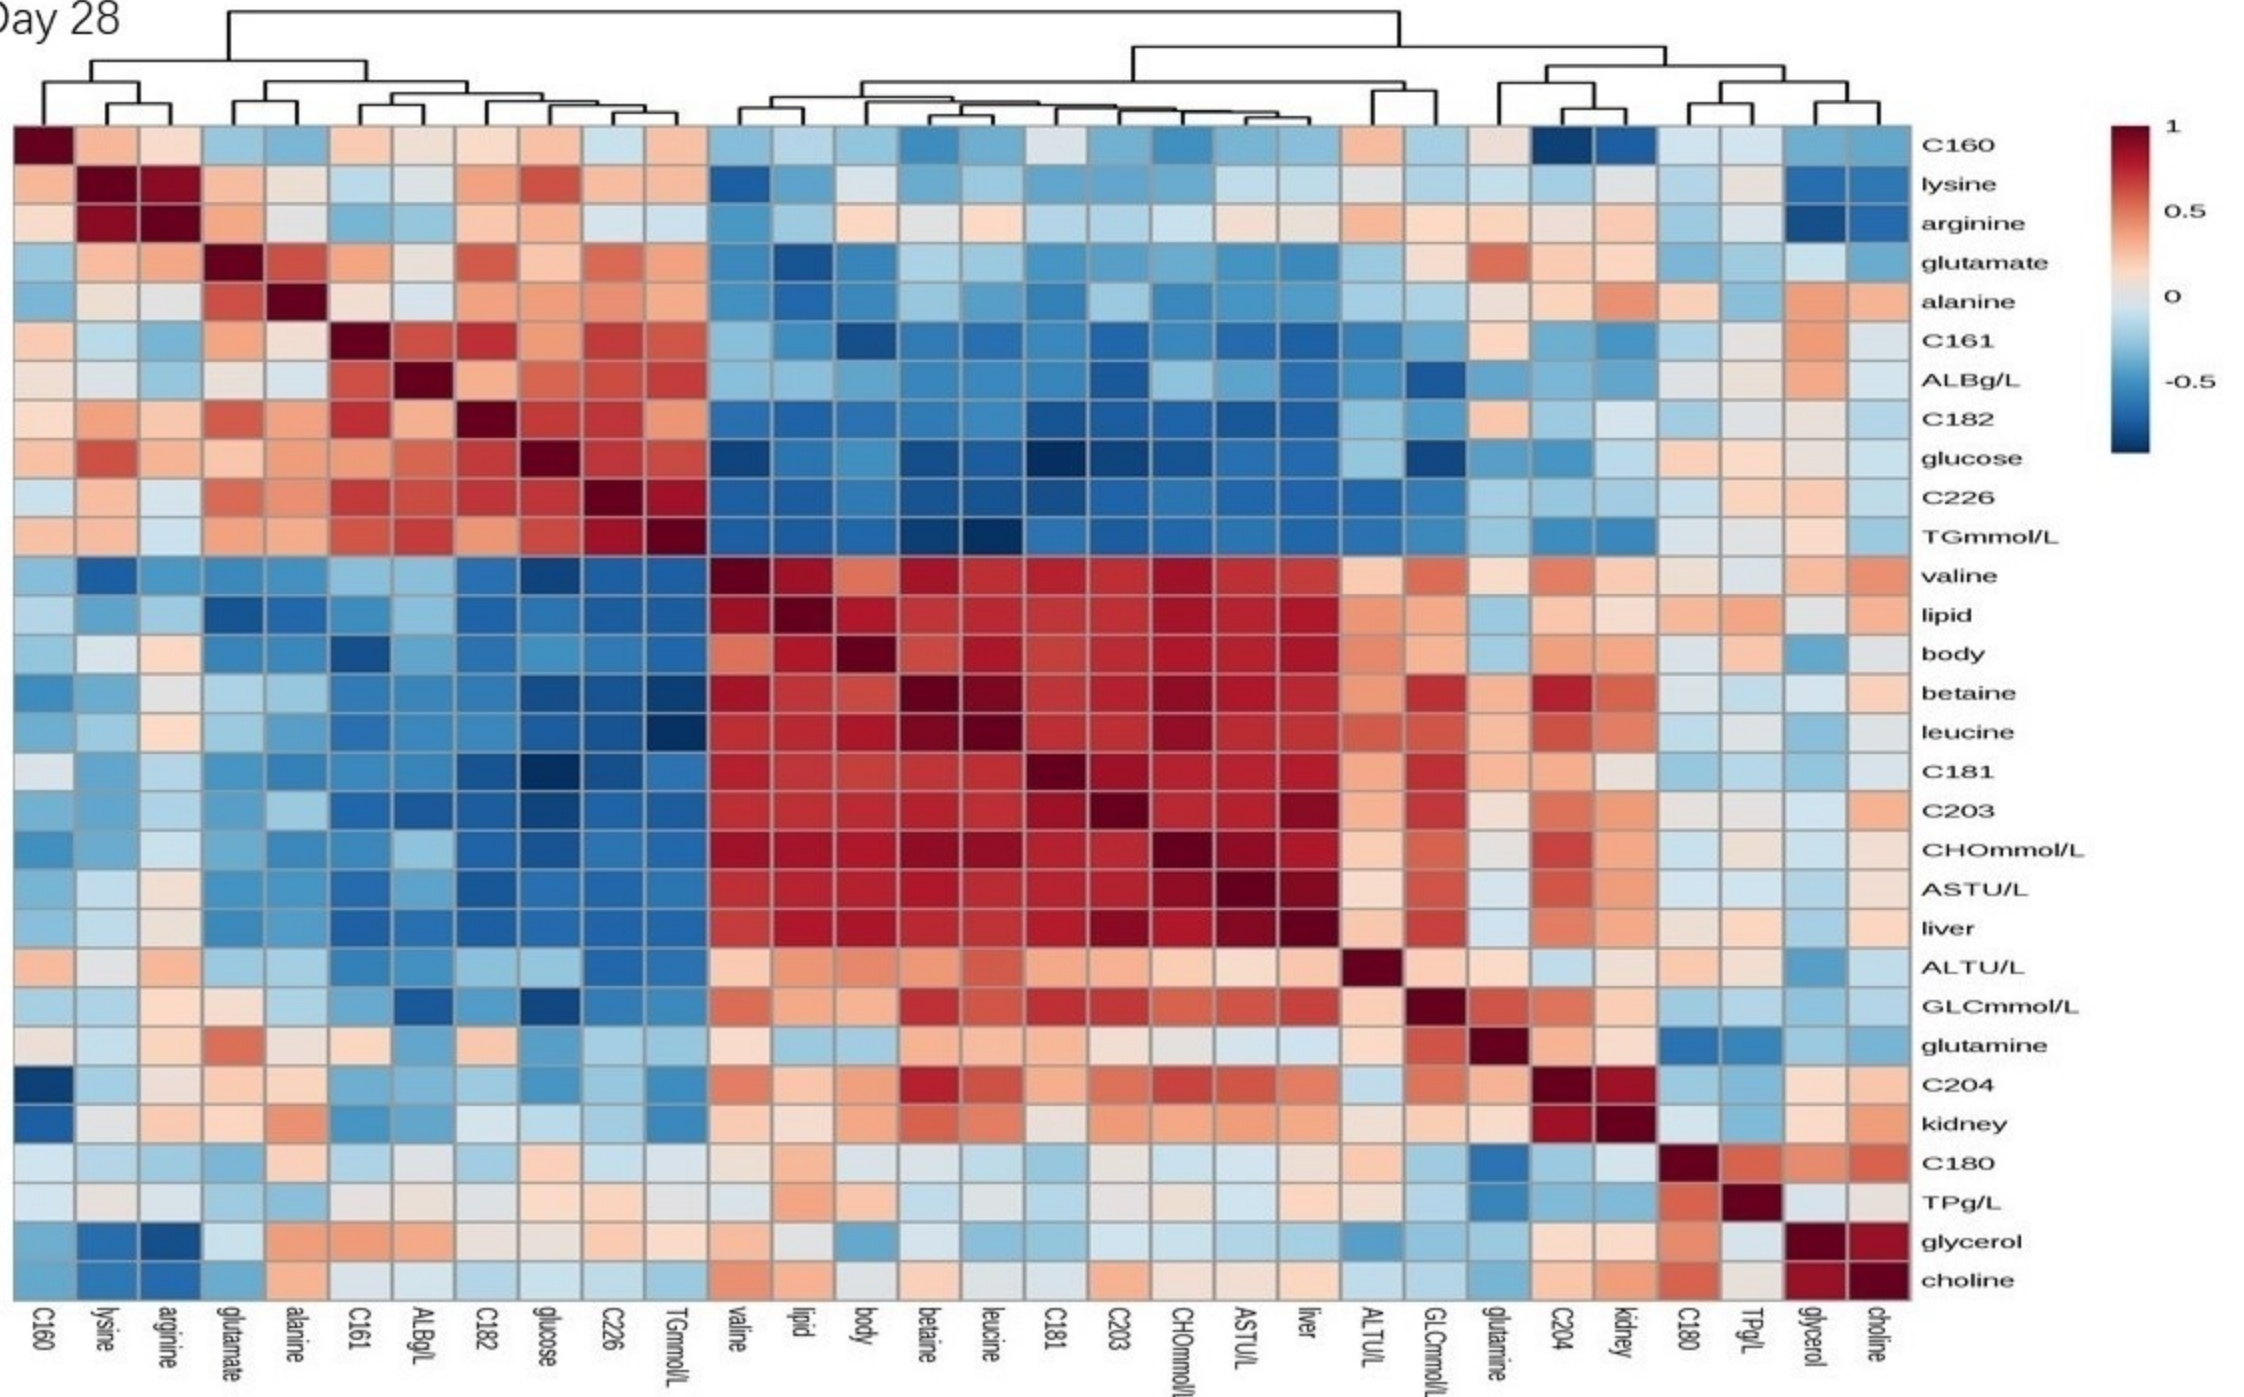

Day 31

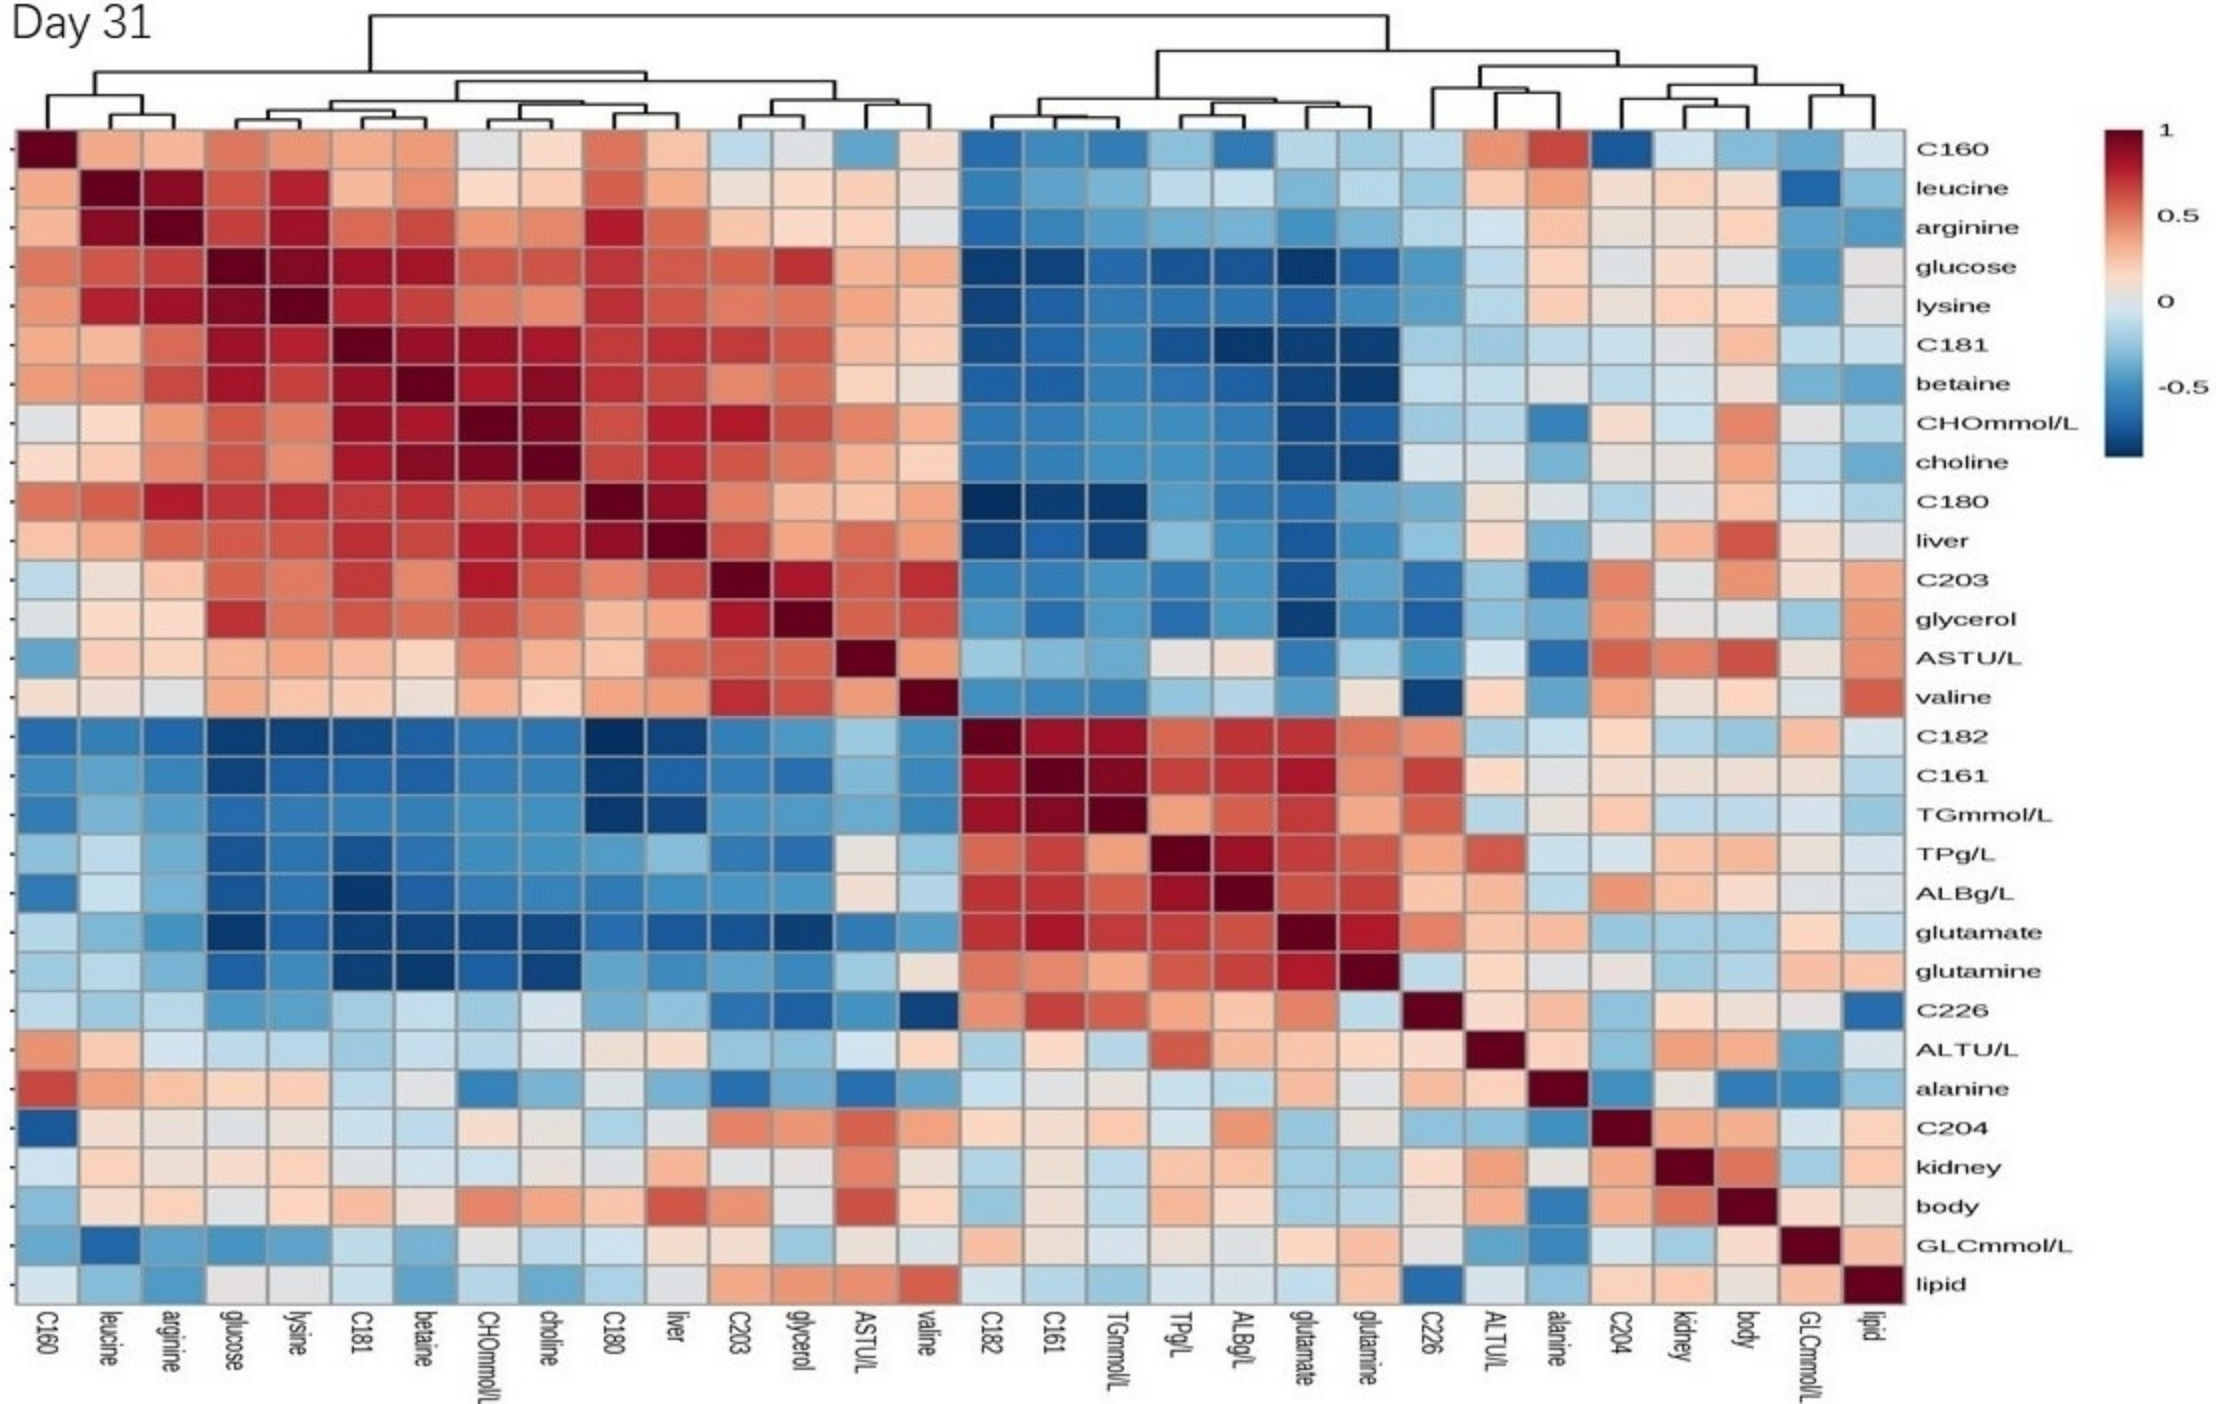



Day 35

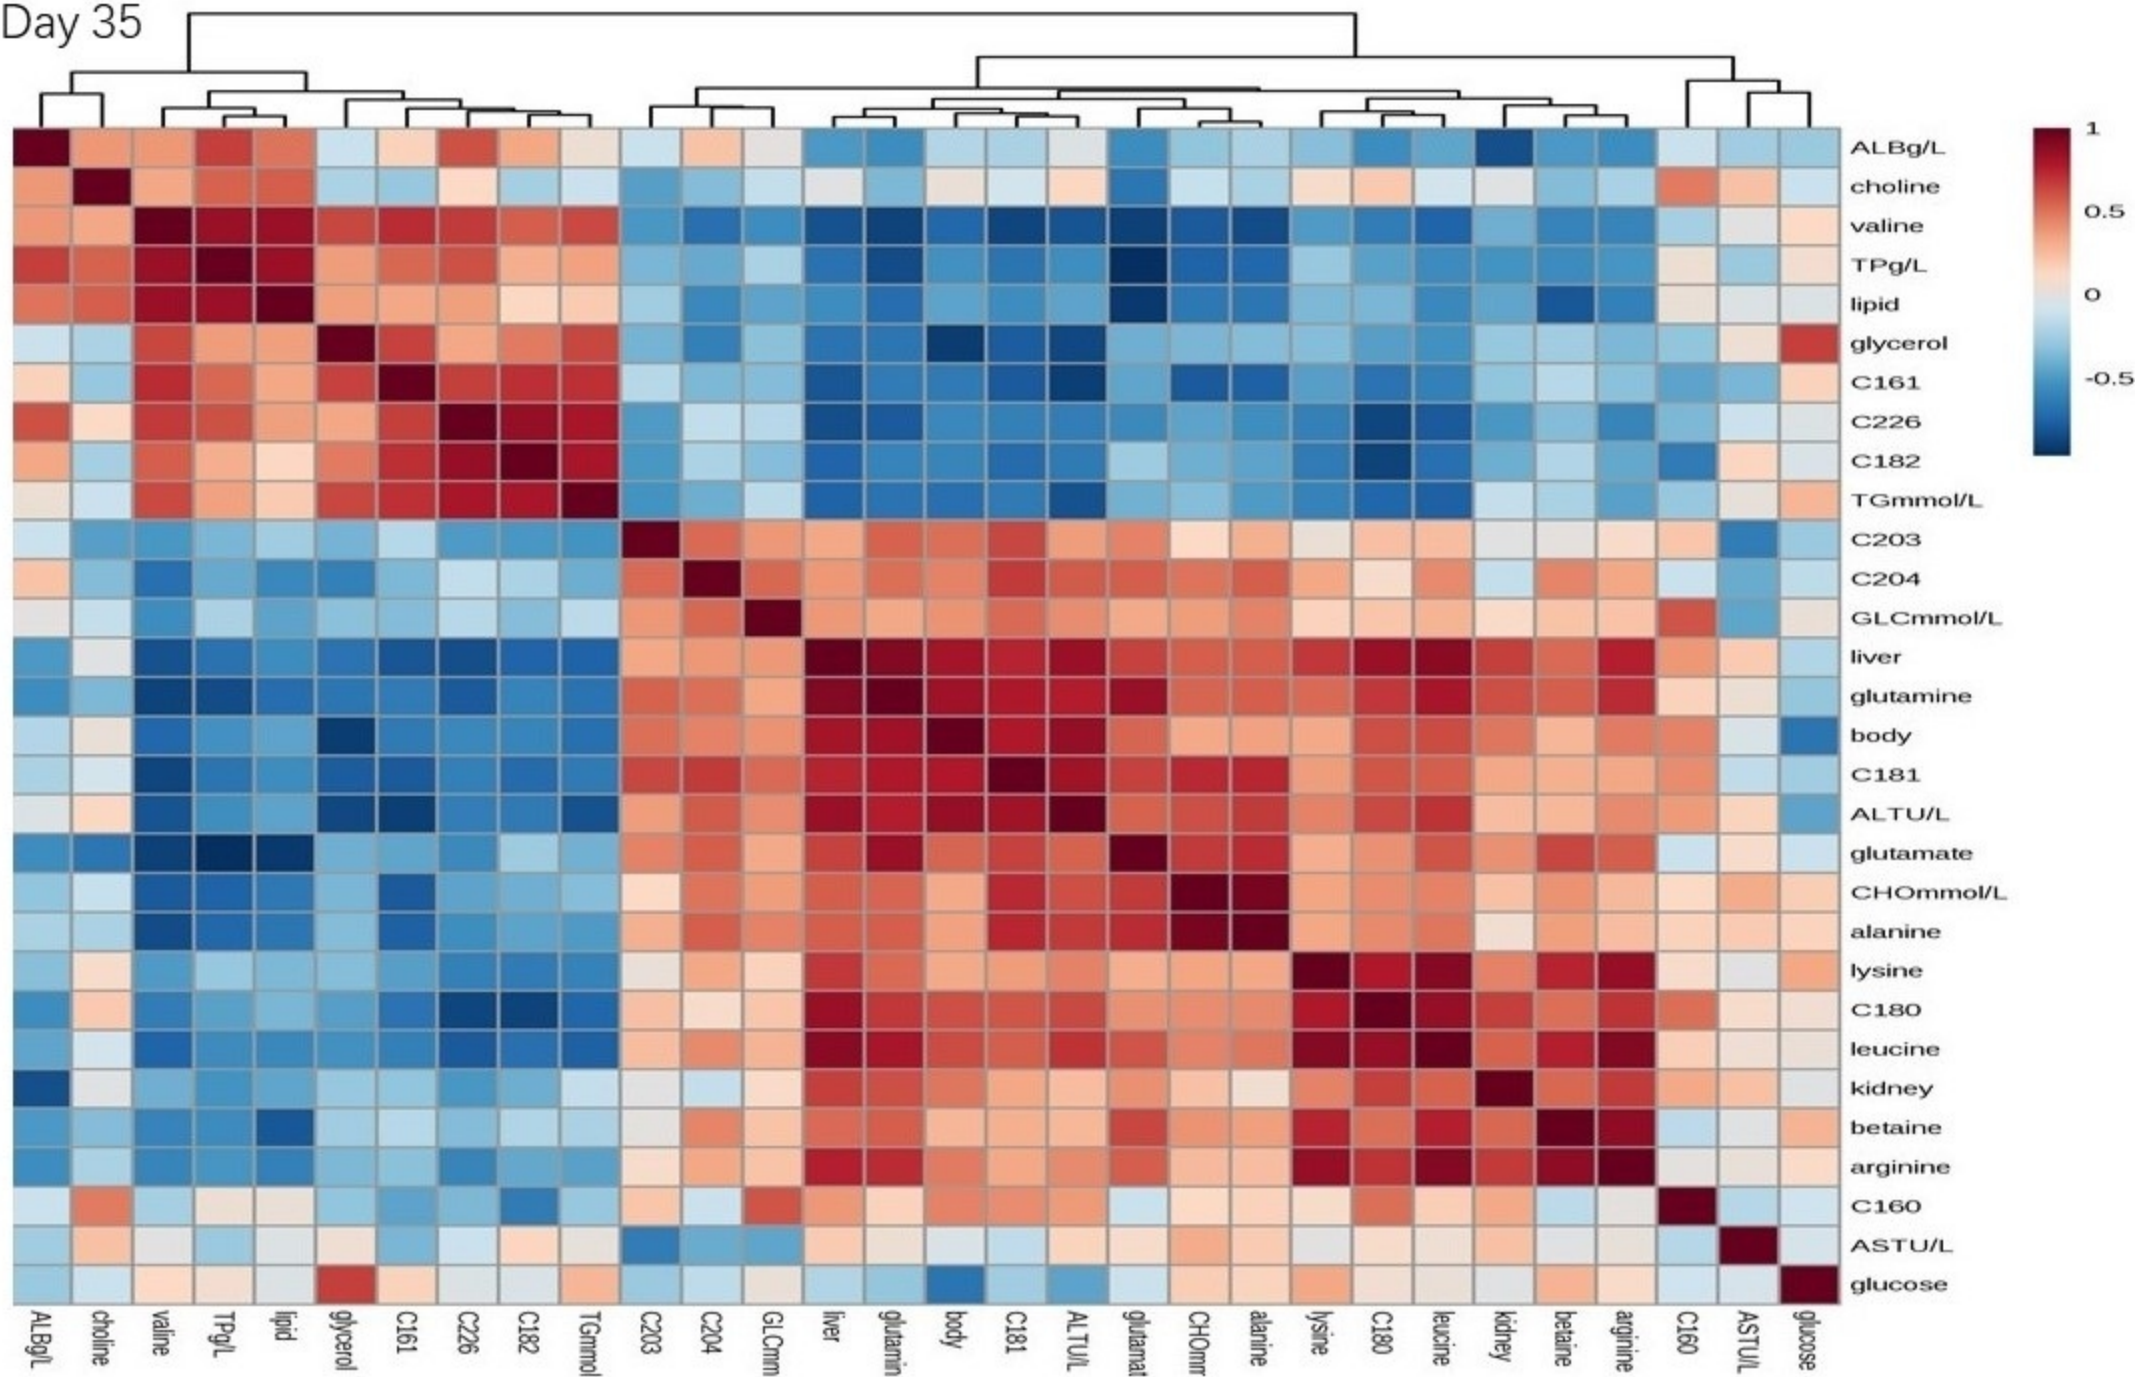

Control

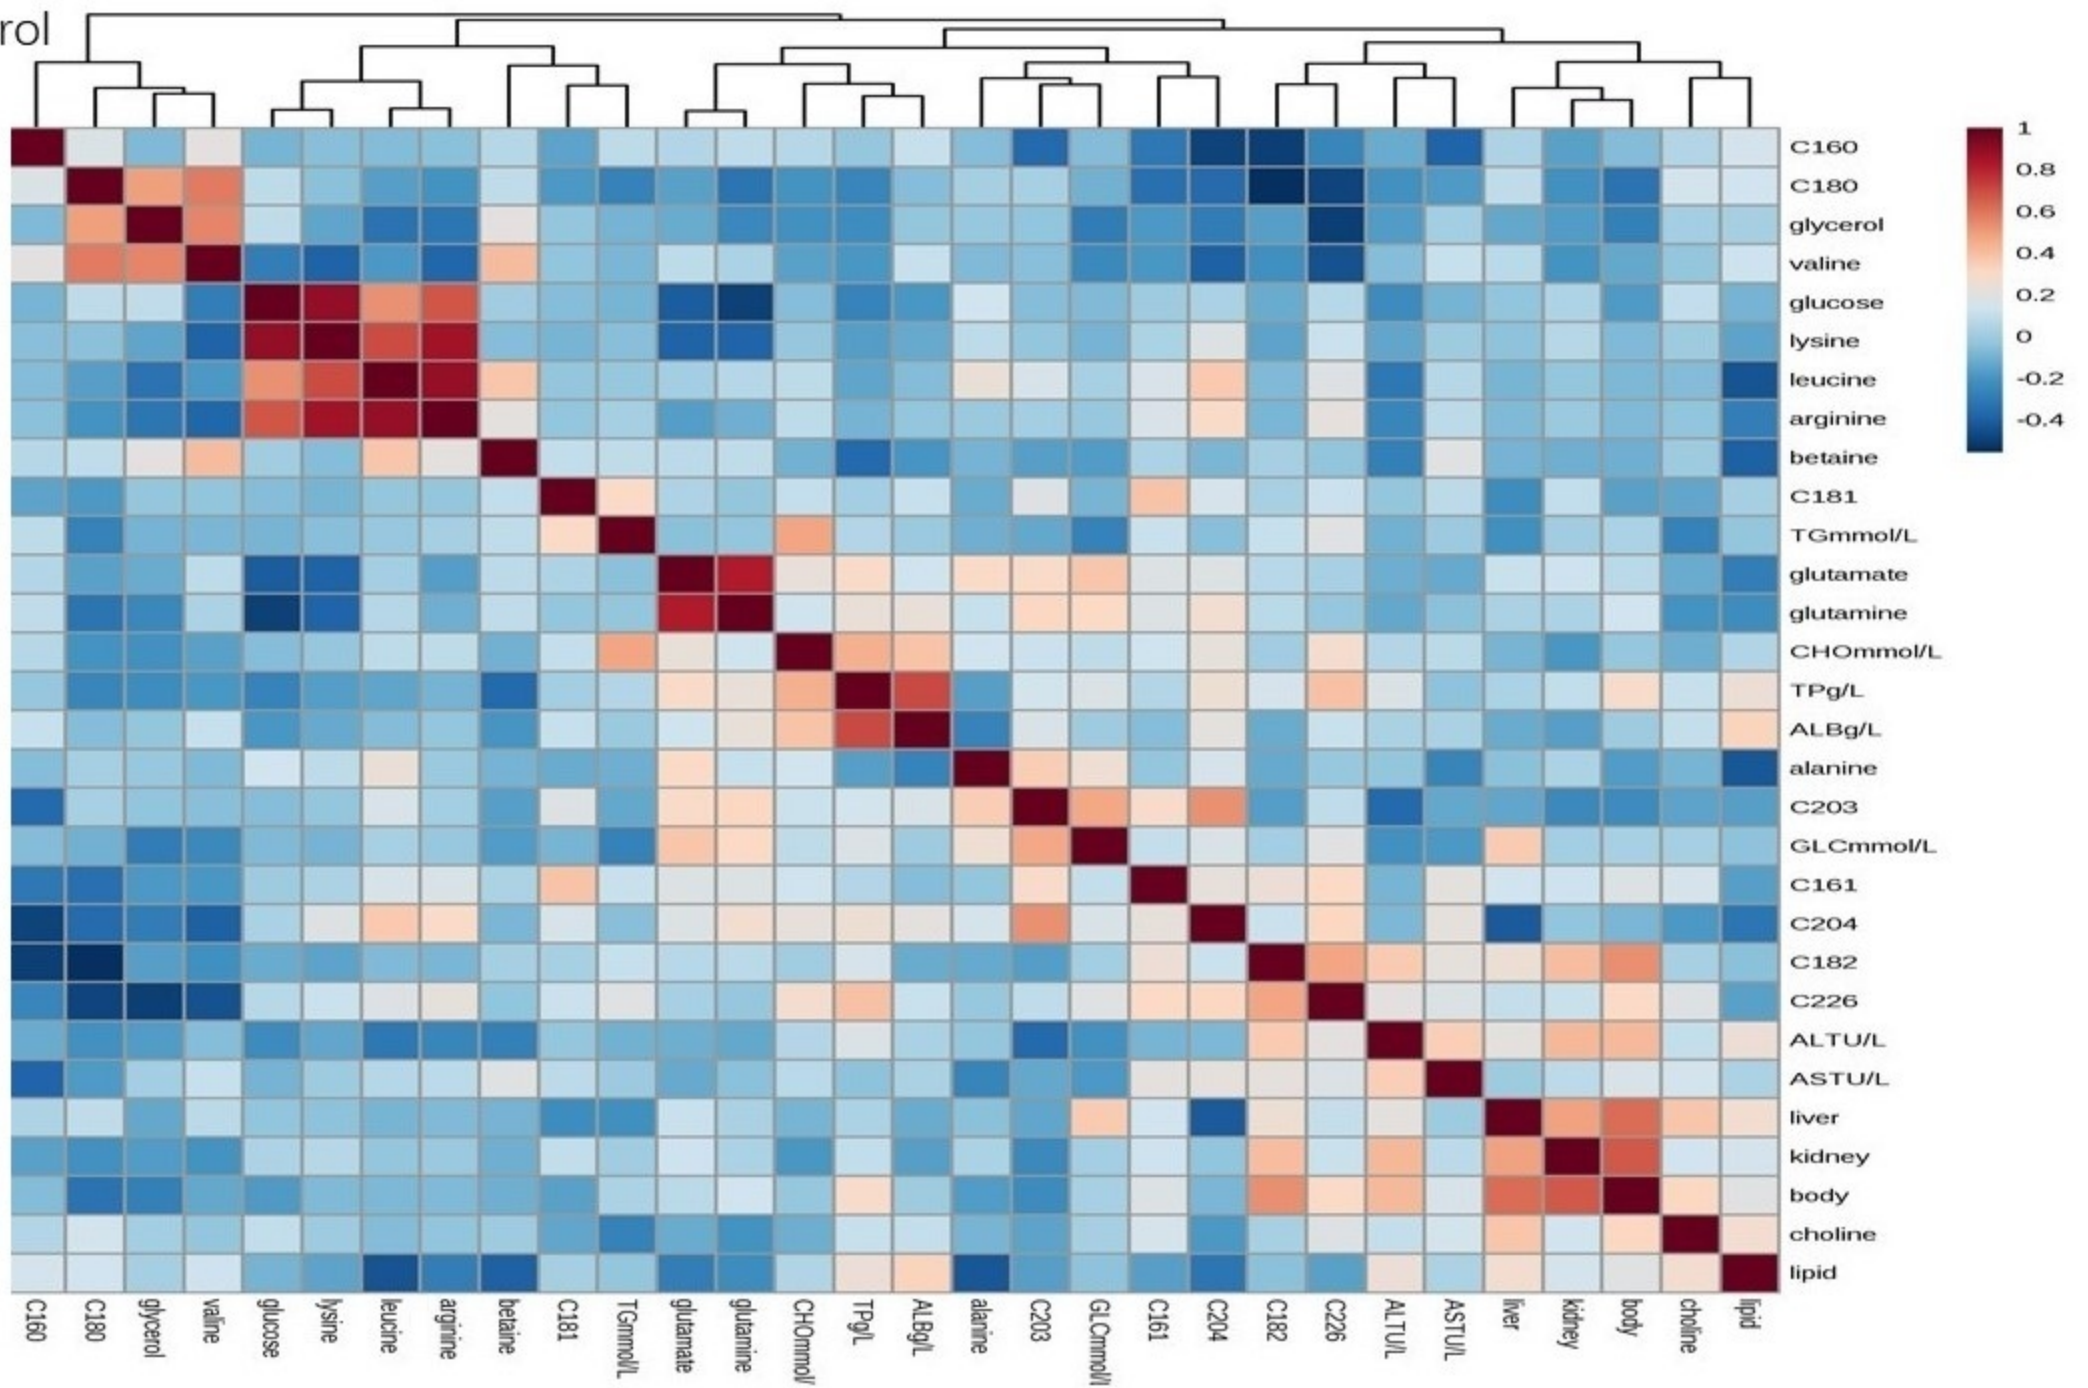

HFD

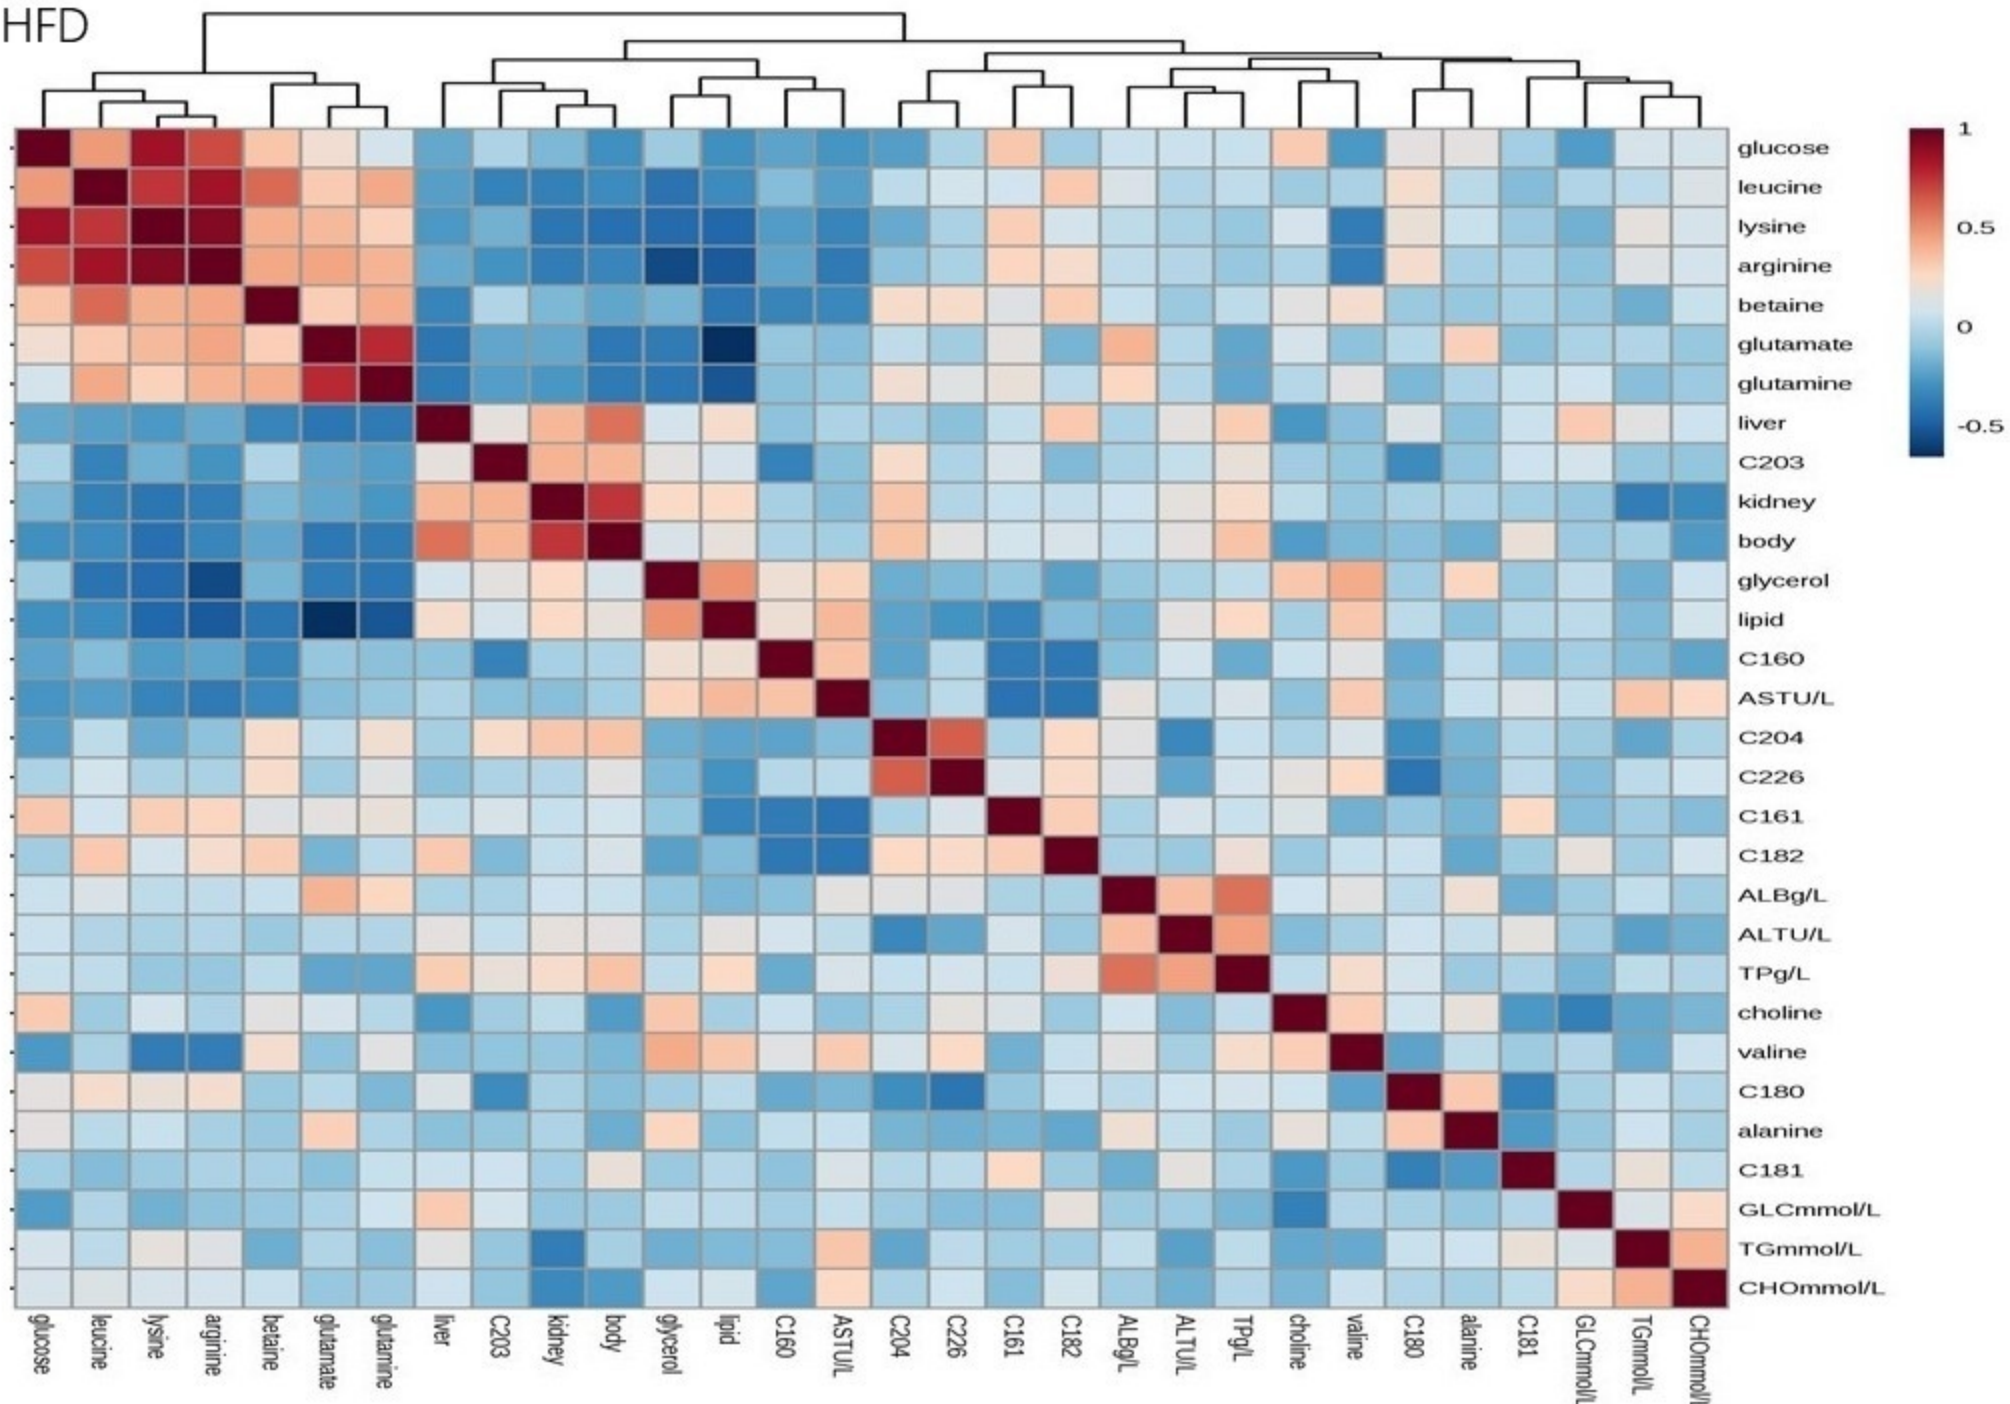

Supplement: d0ay00487a2.pdf [file d0ay00487a2.pdf]
